# Supplementary material
Source: PubMed Central journal article supplement (PMC3875372)

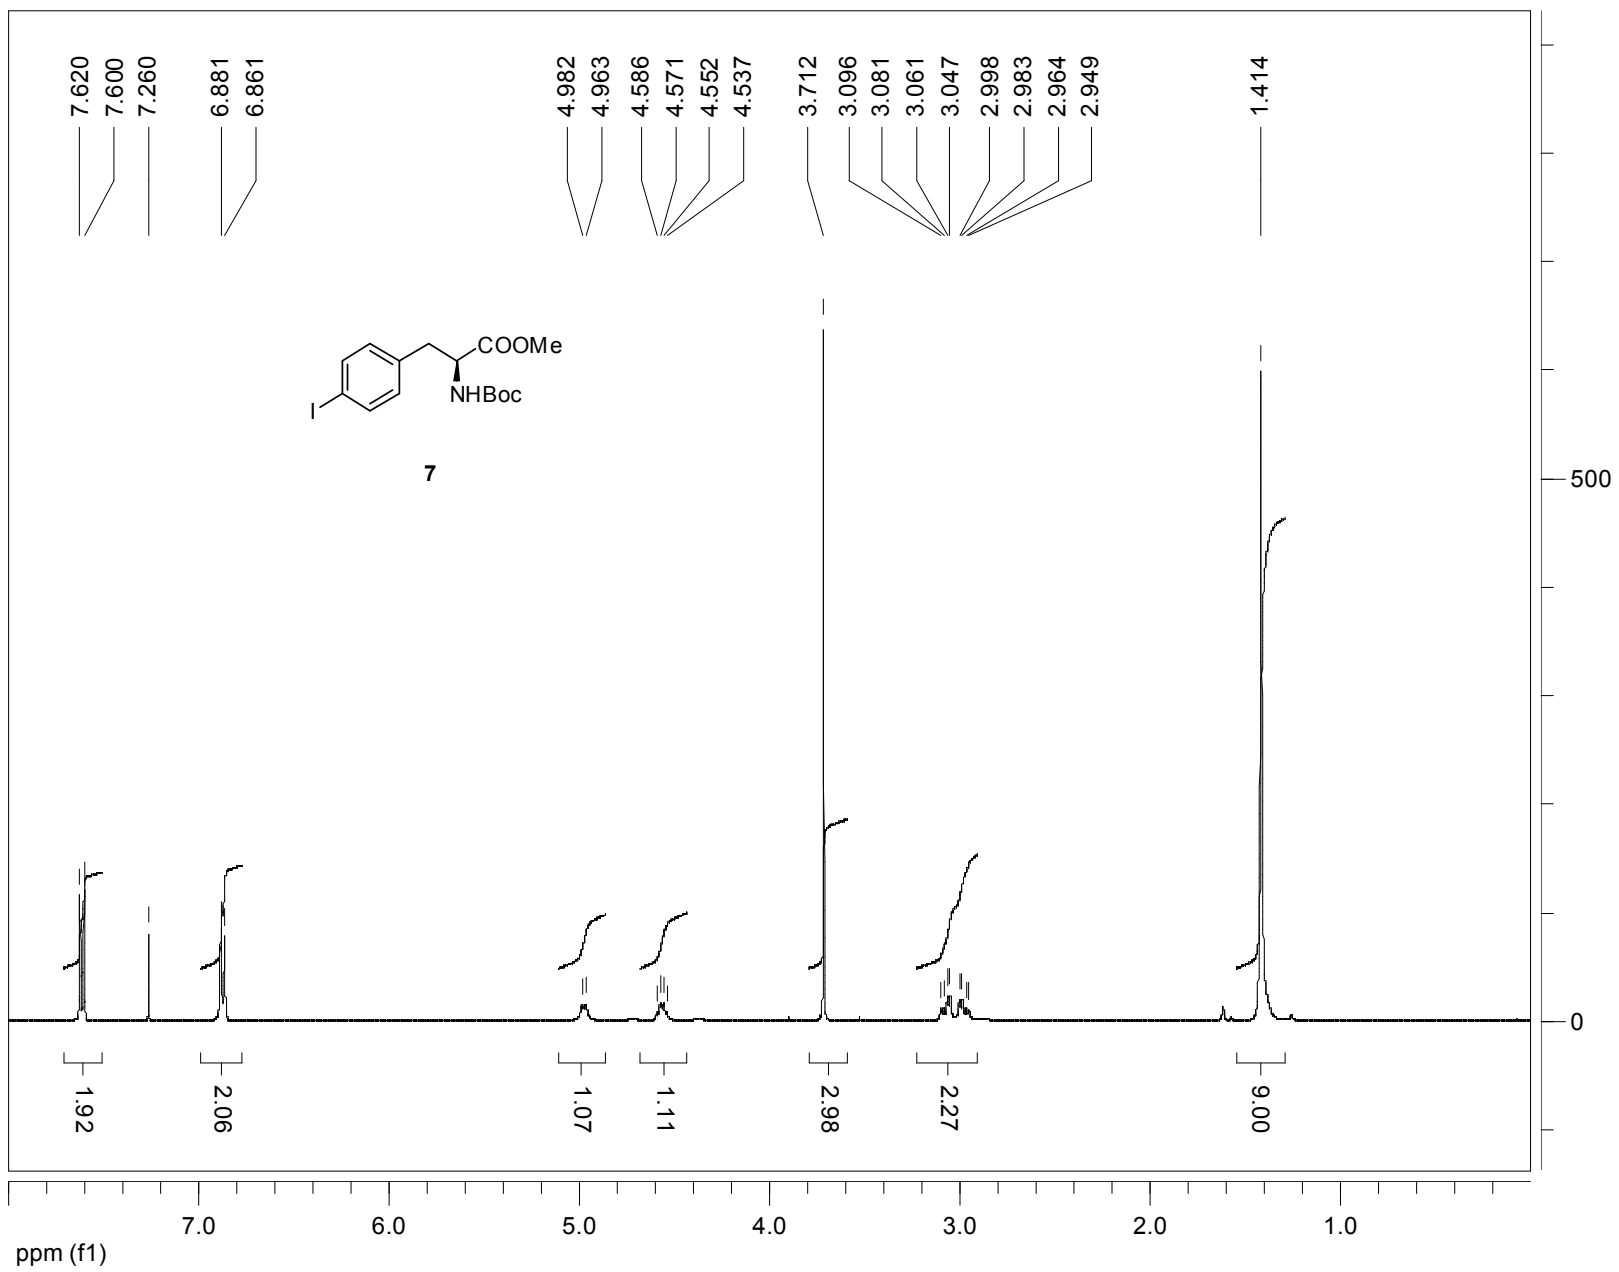

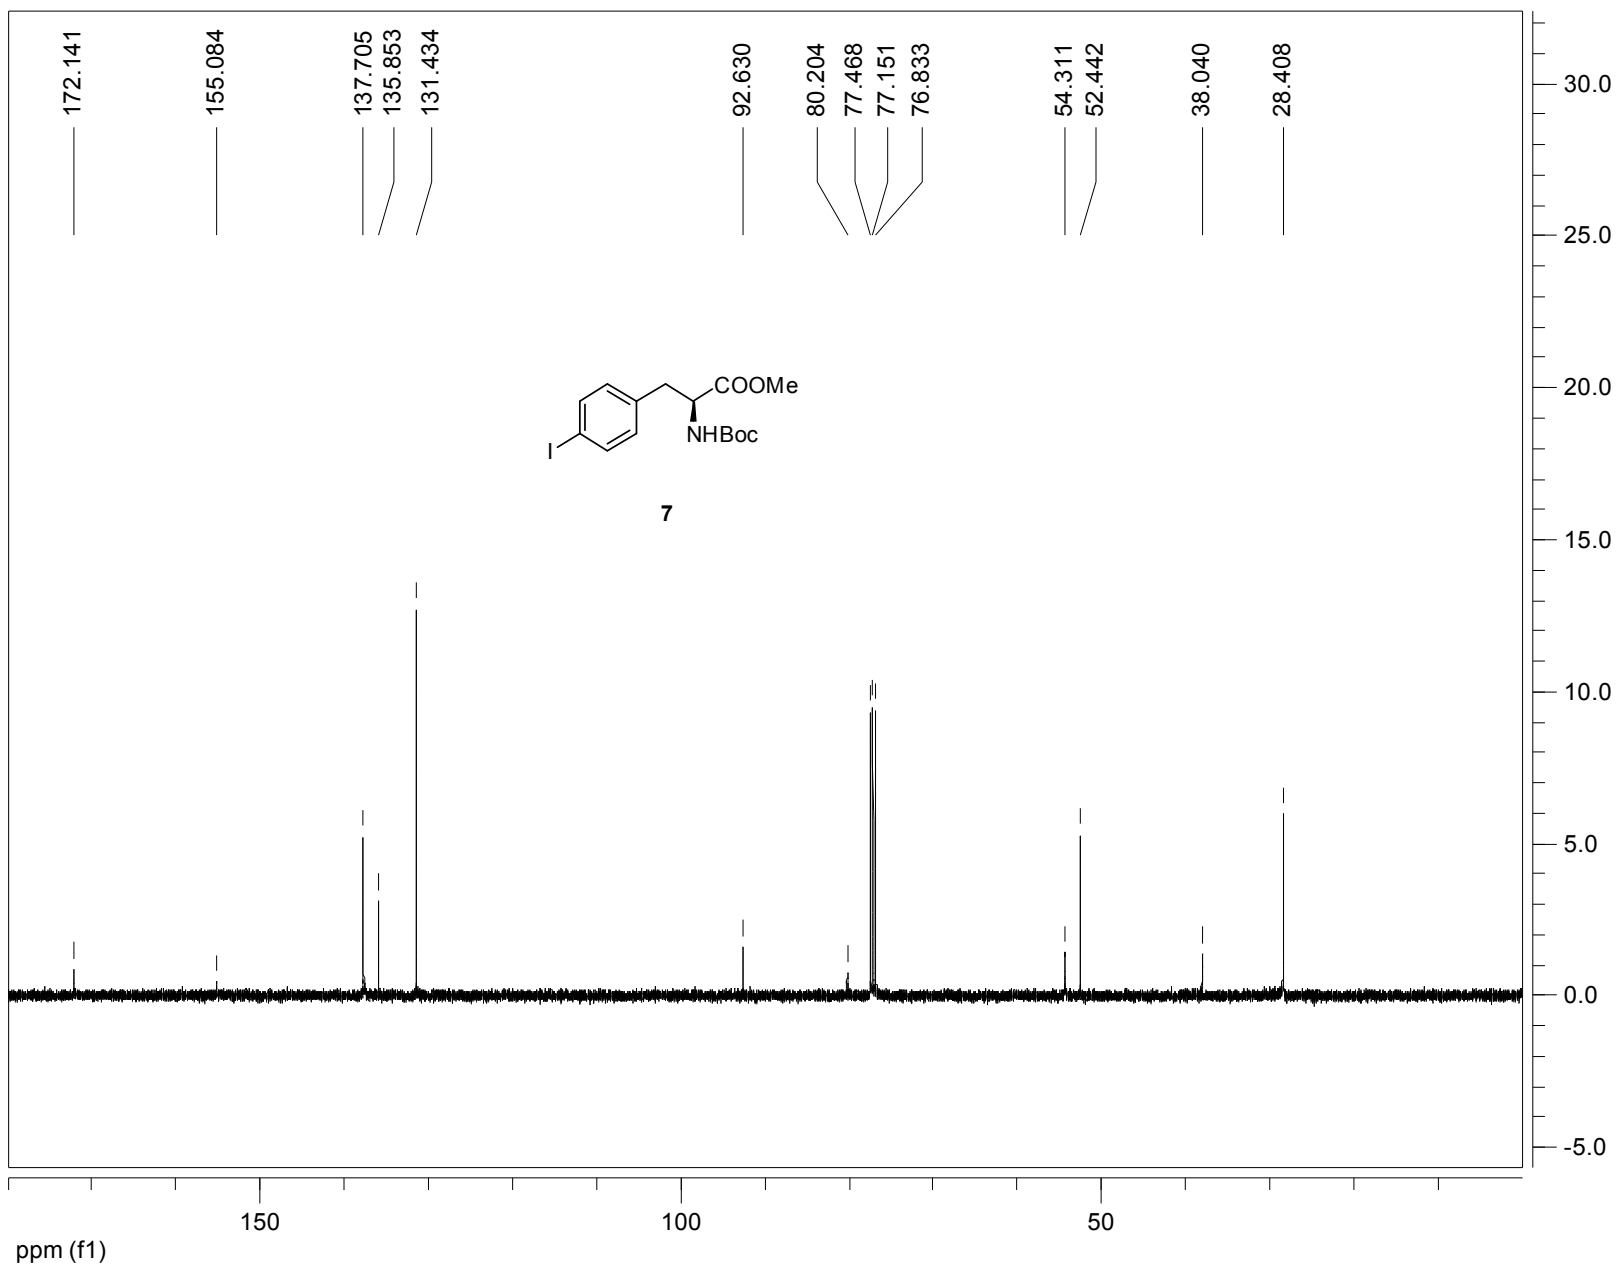

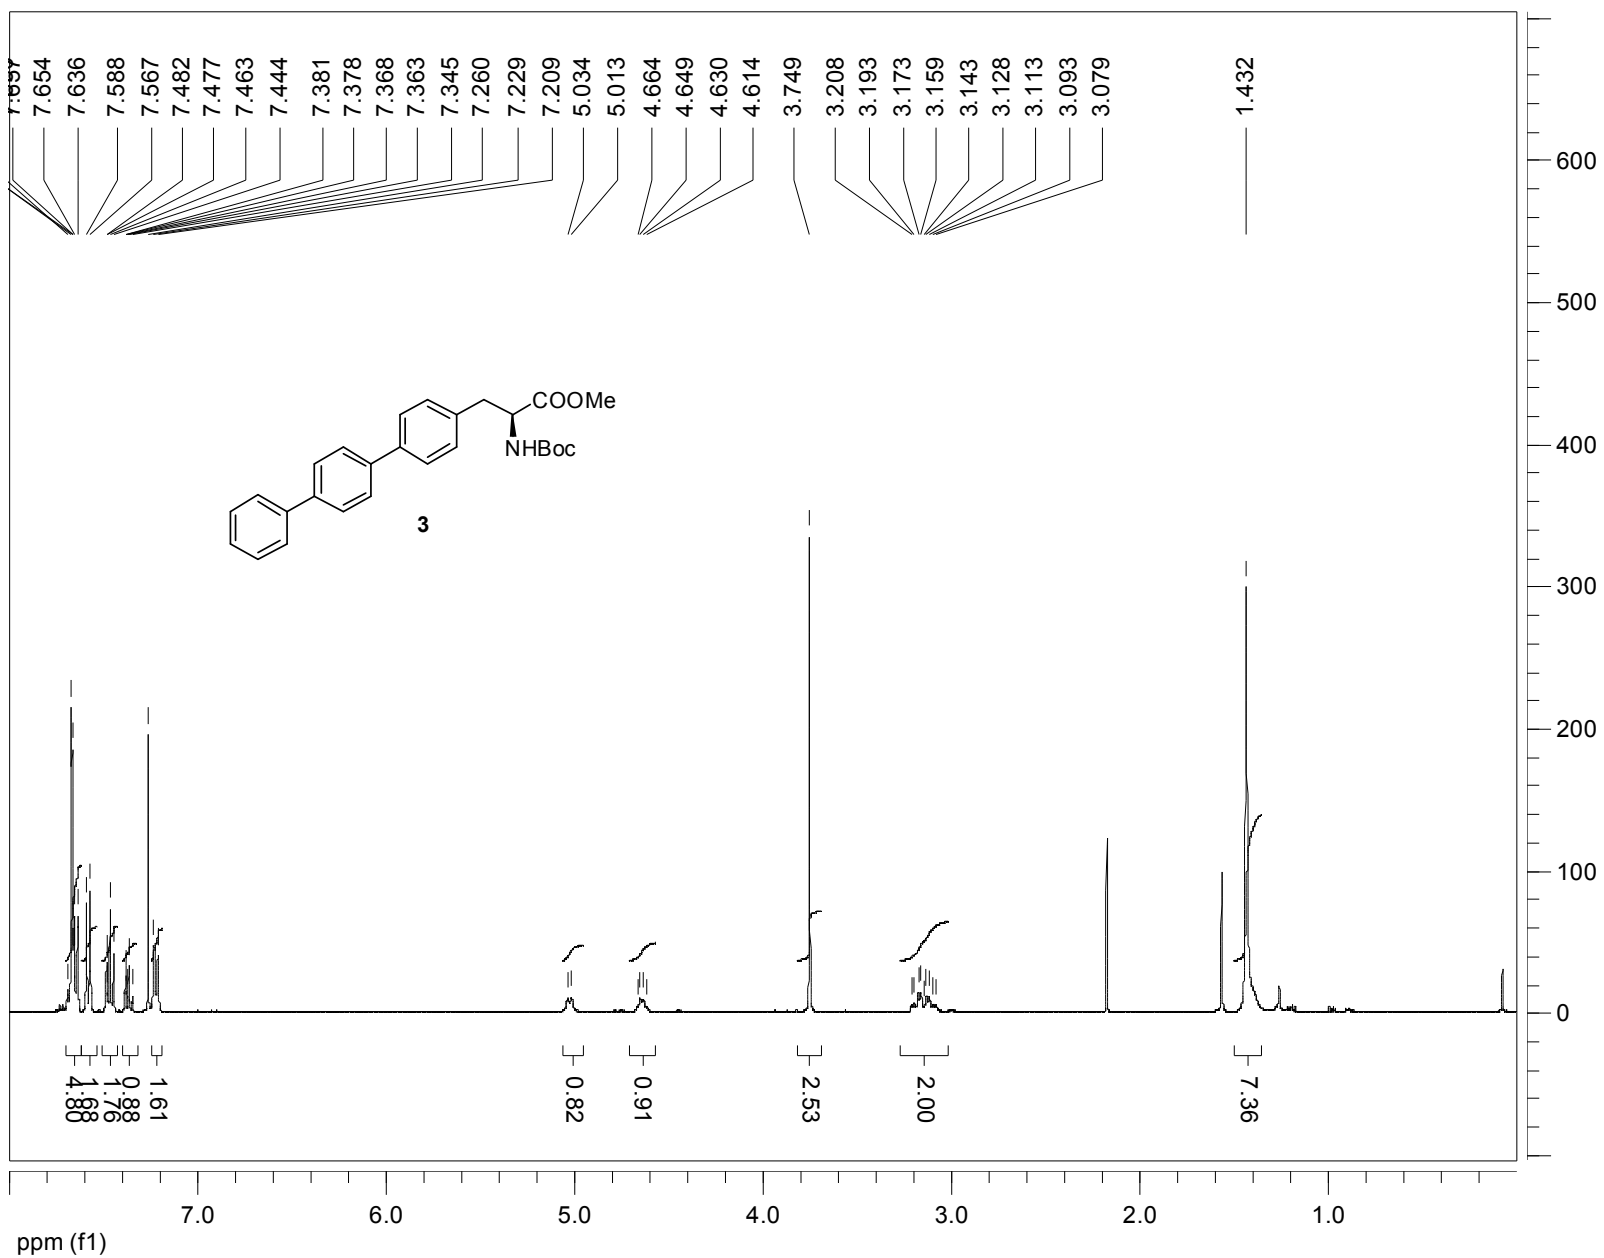

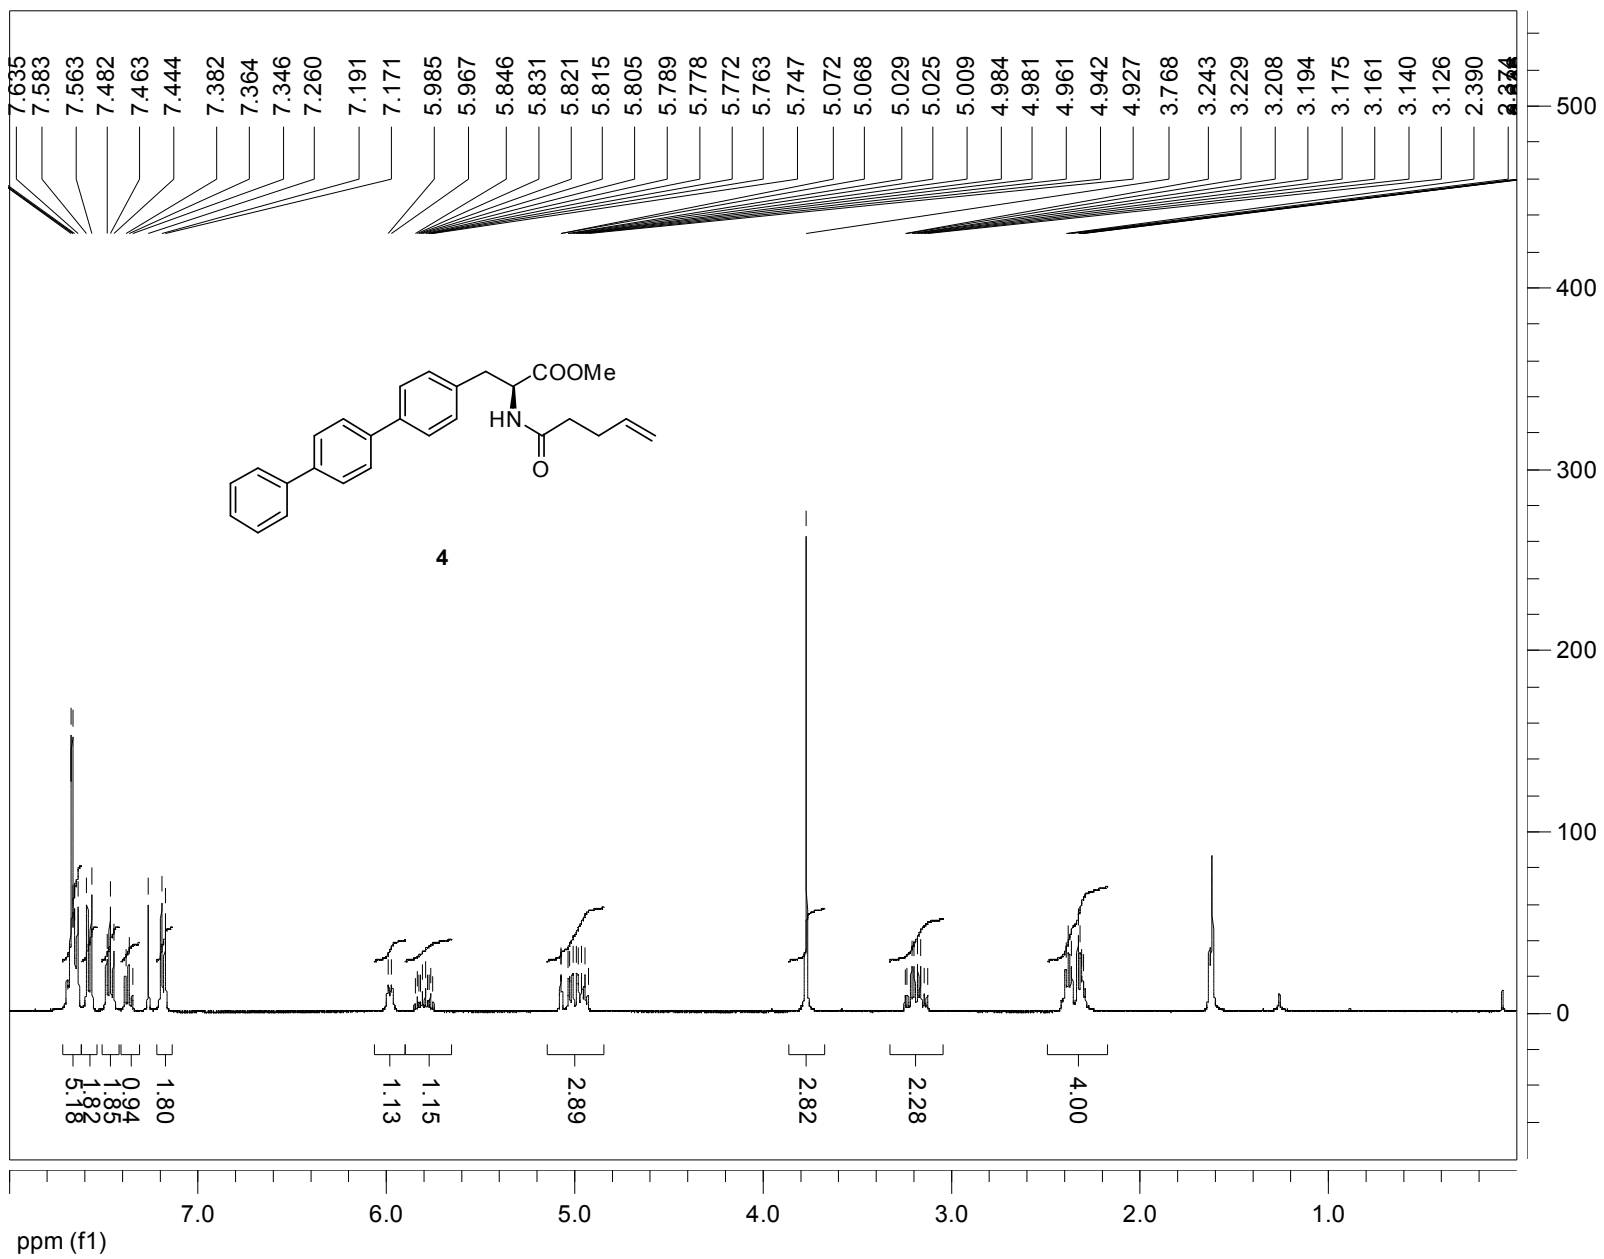

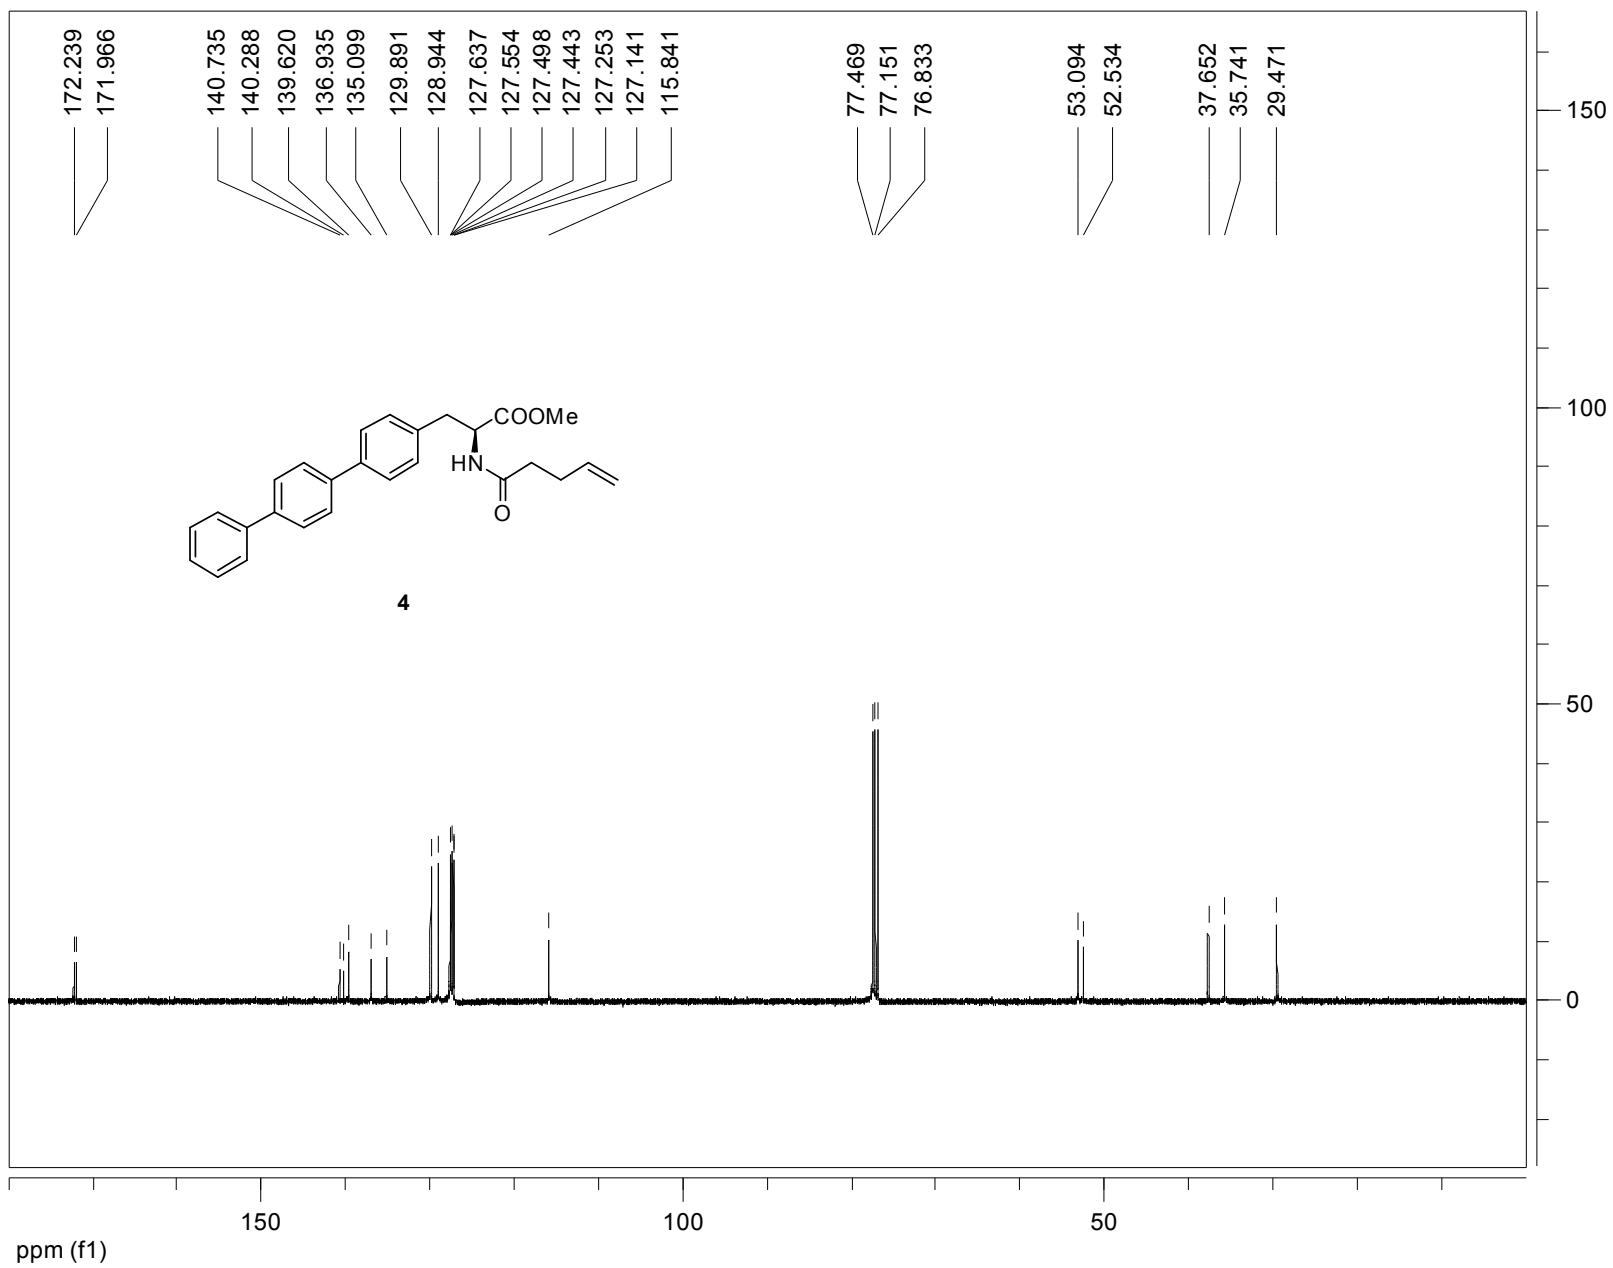

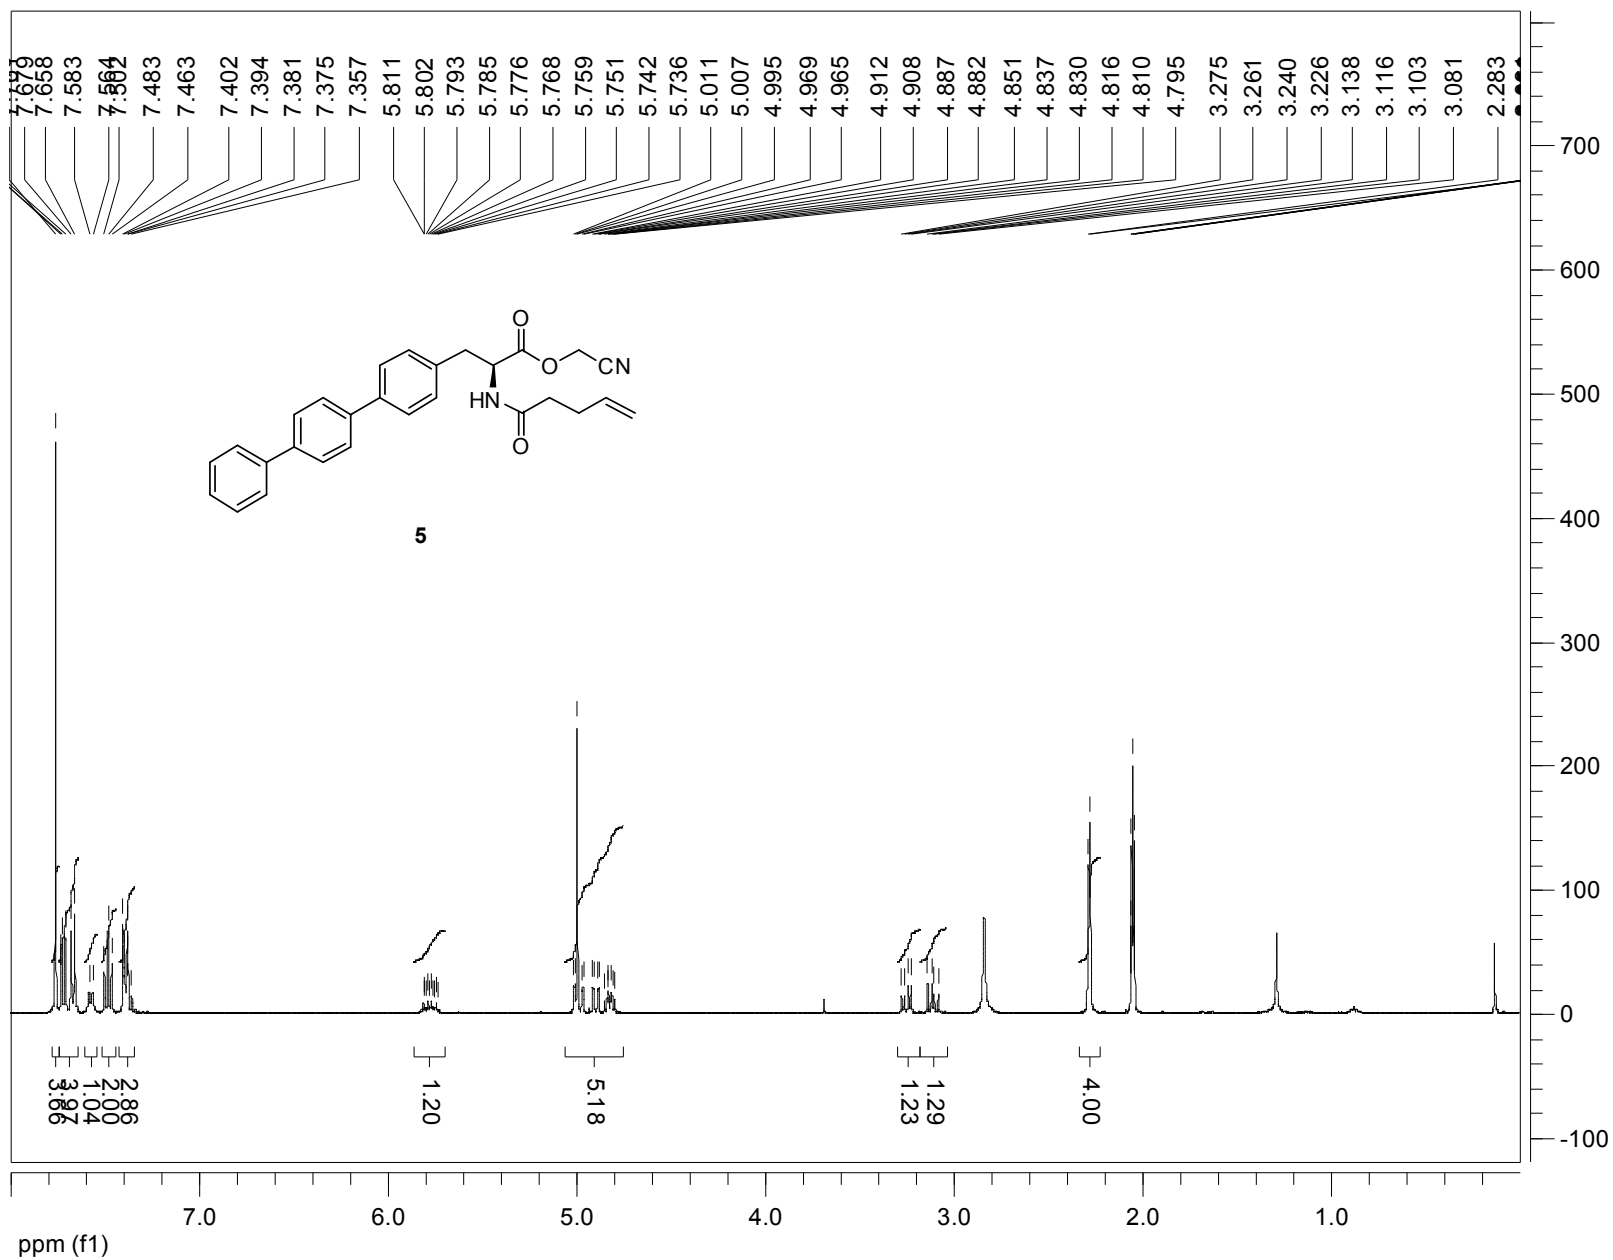

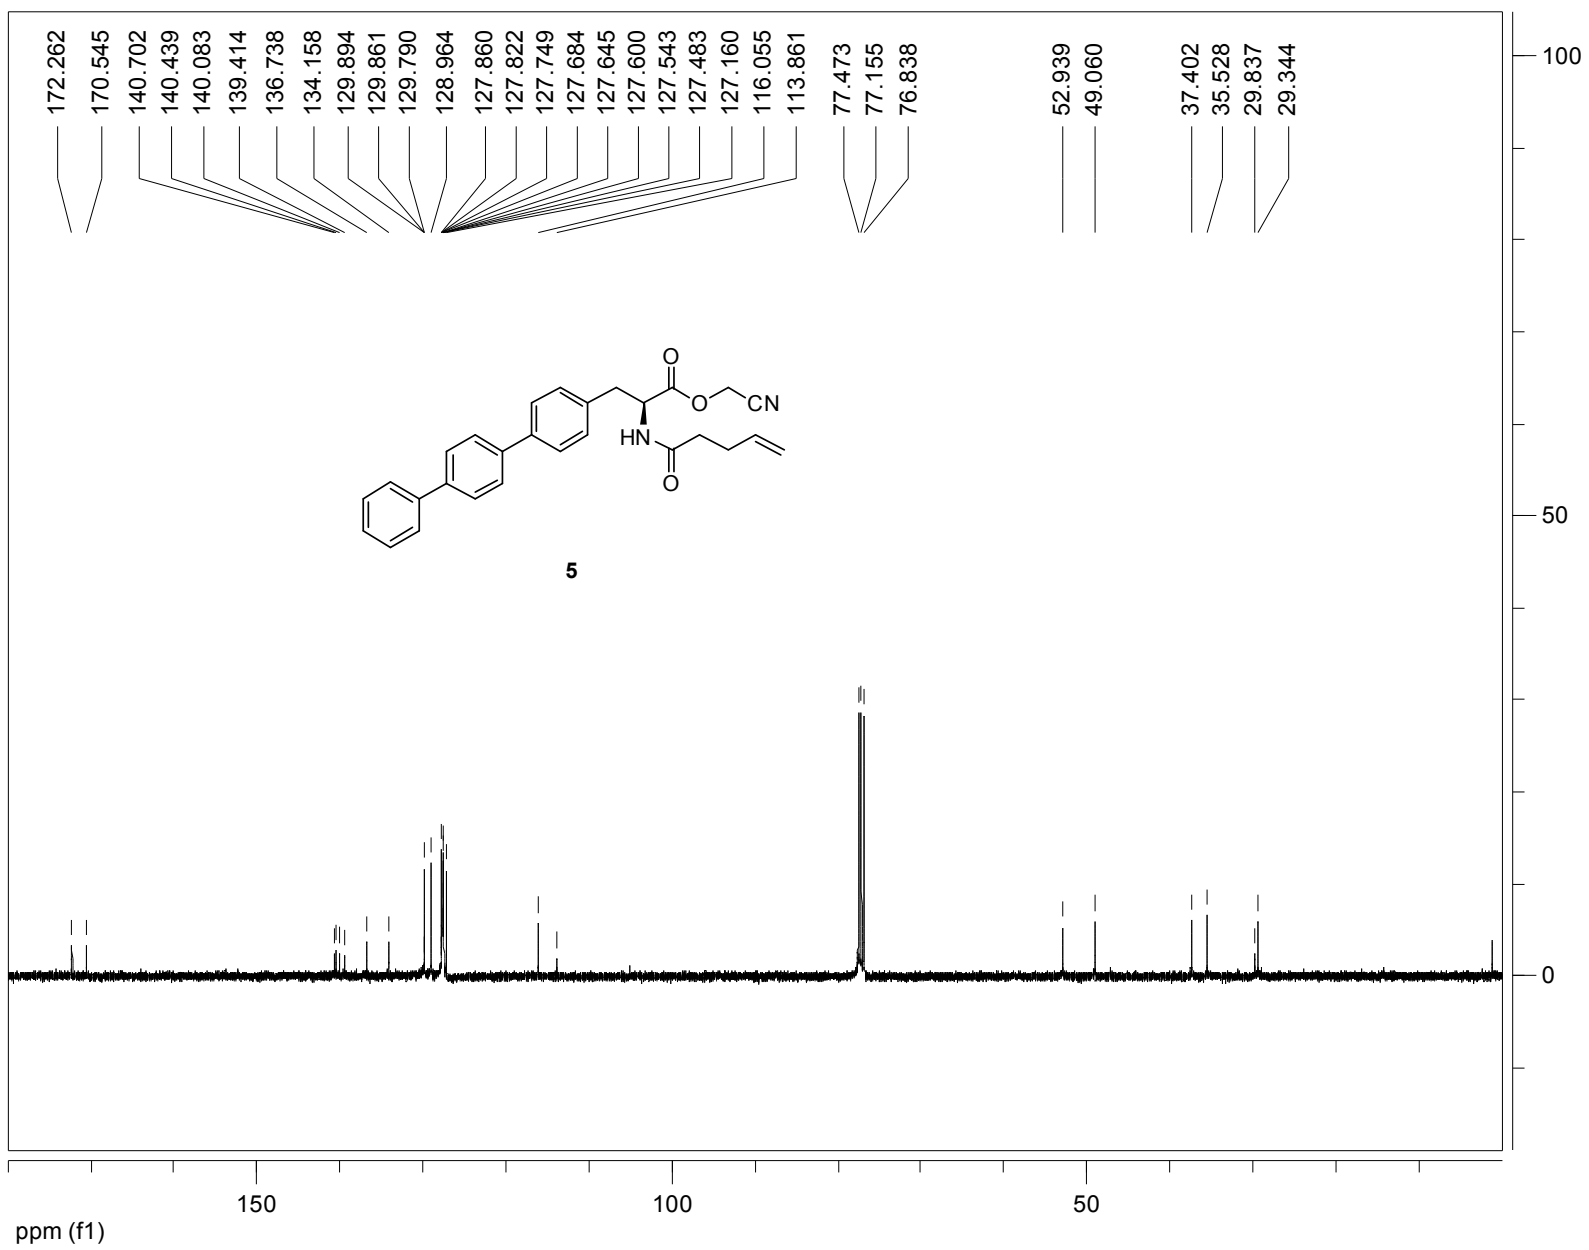

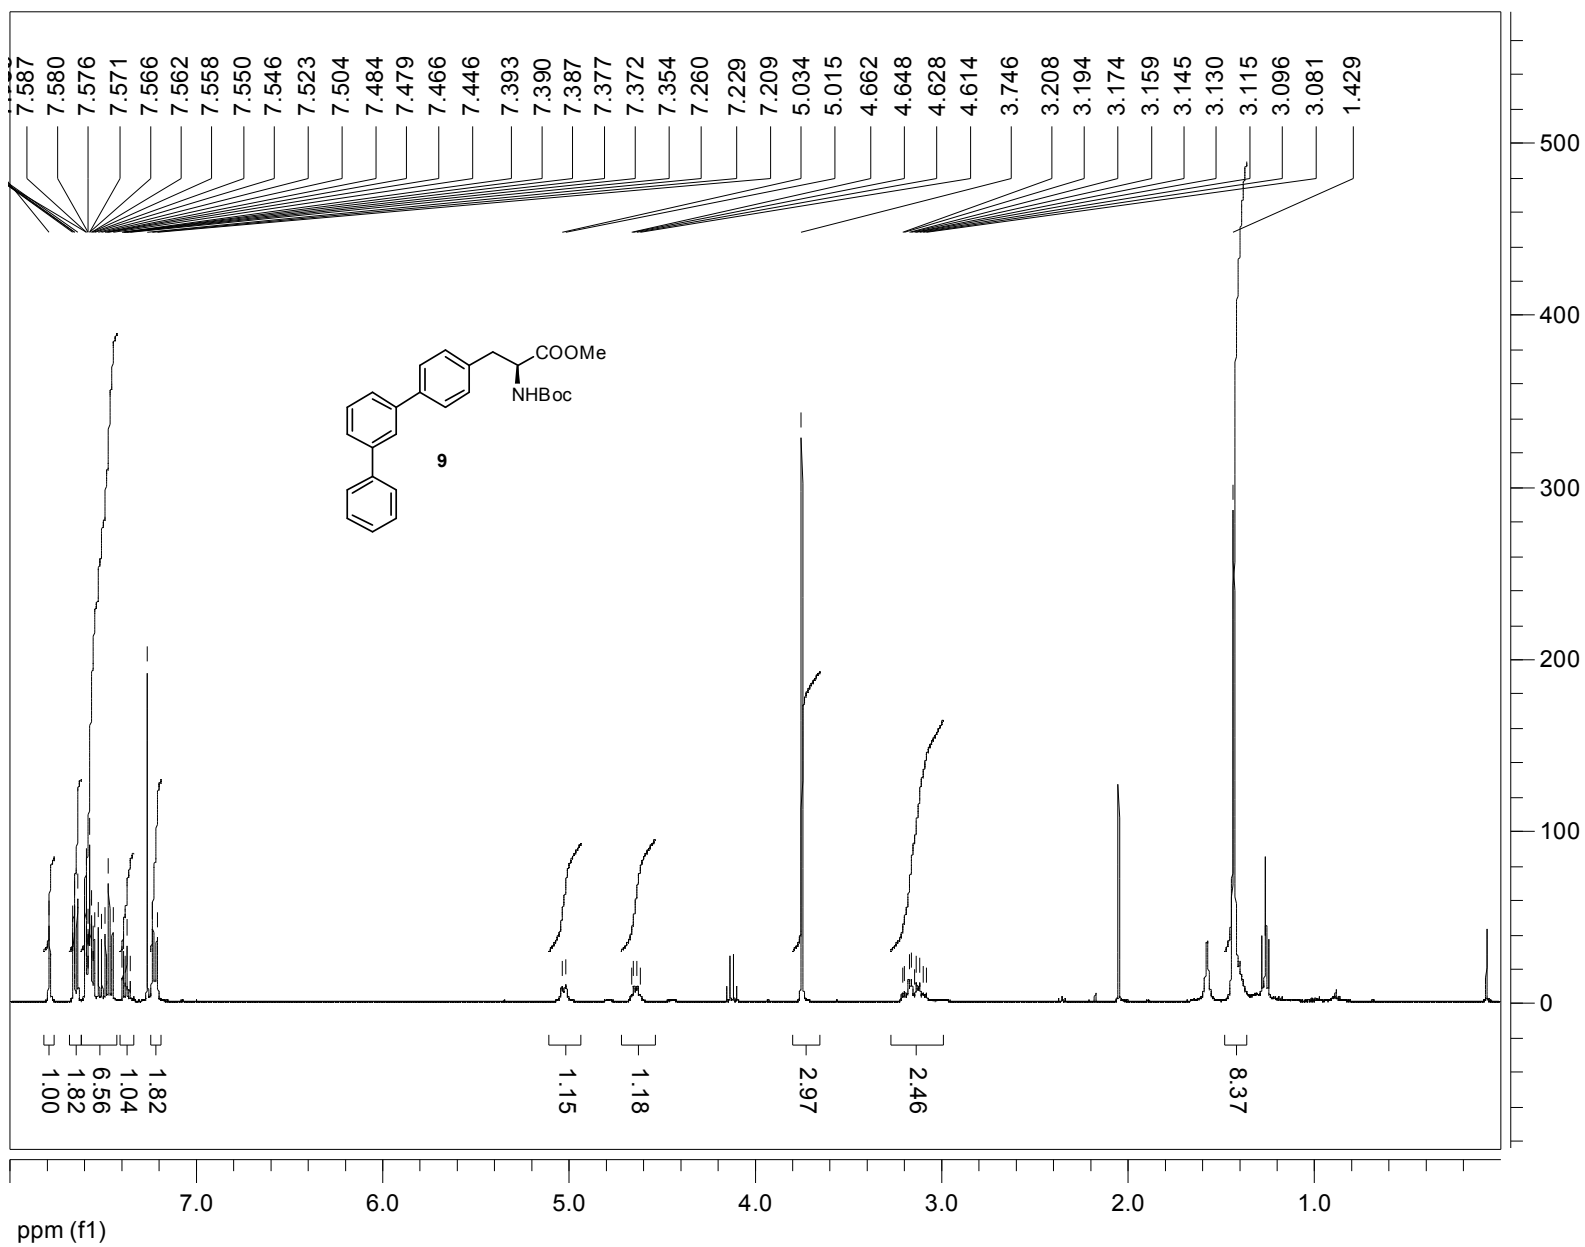



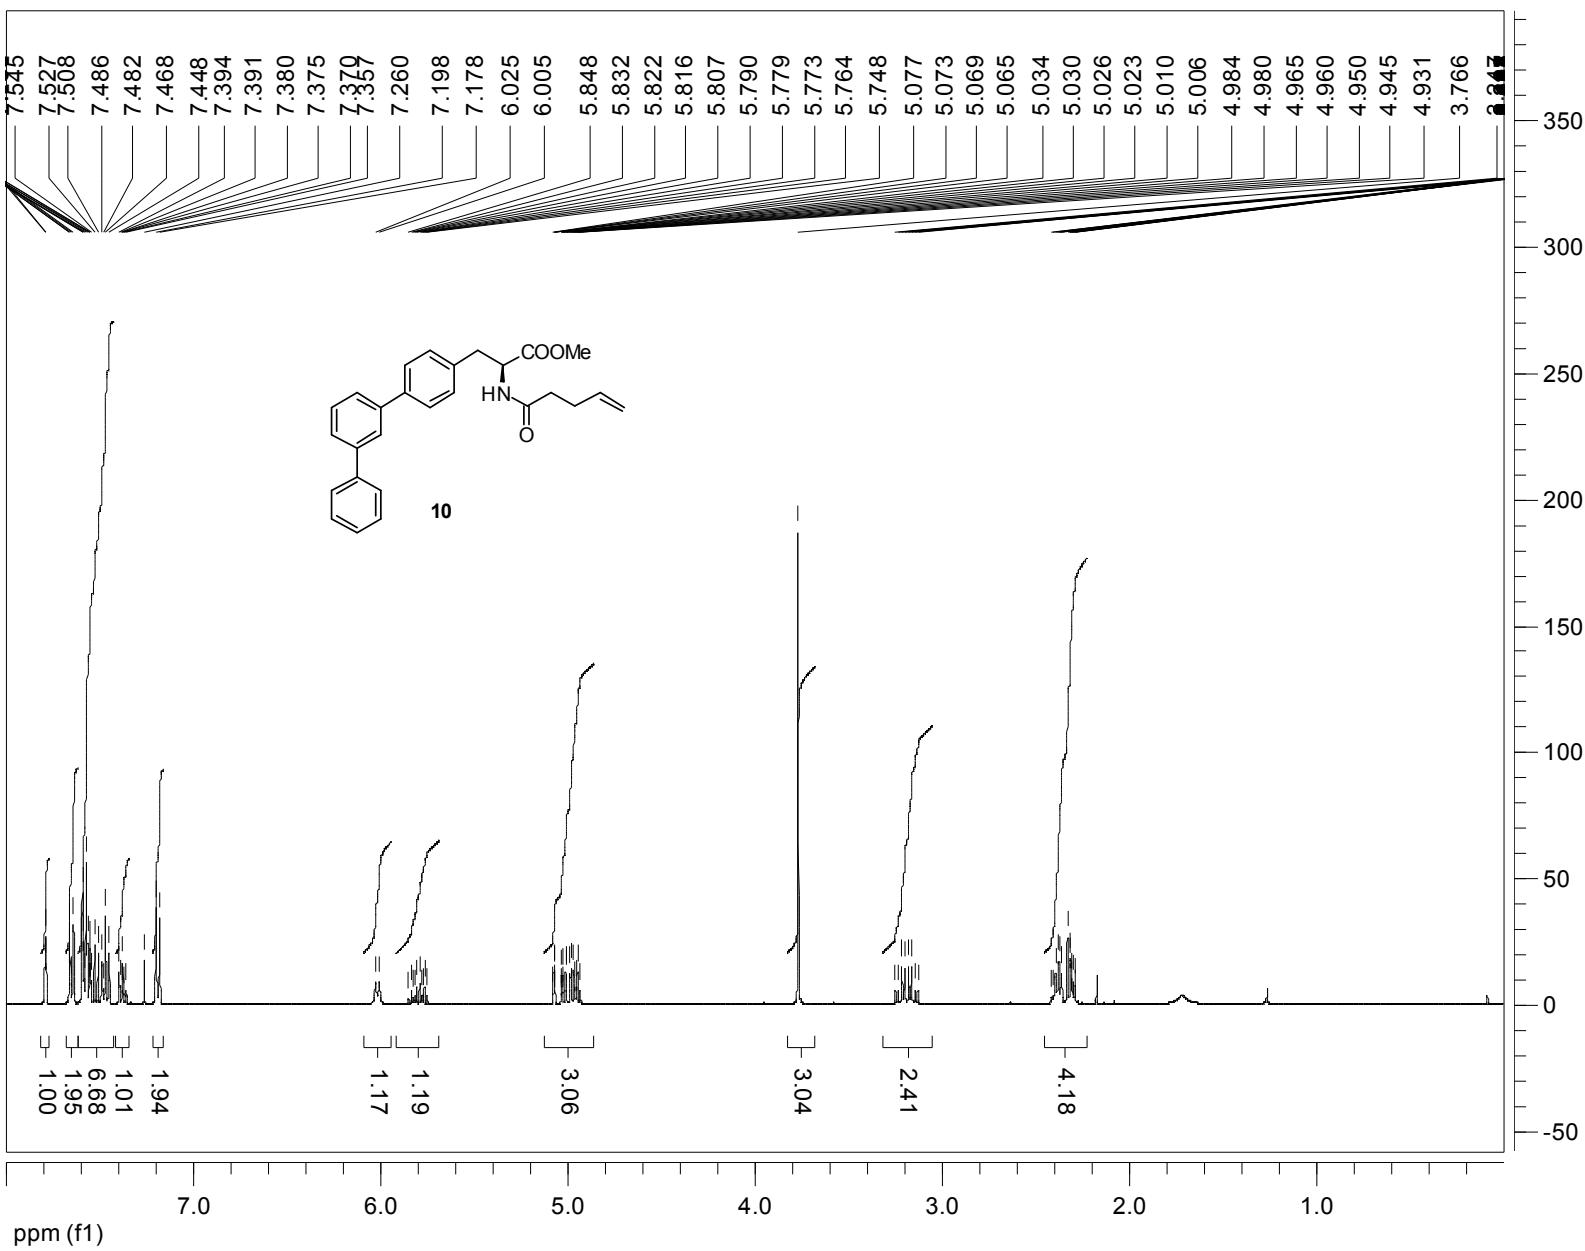

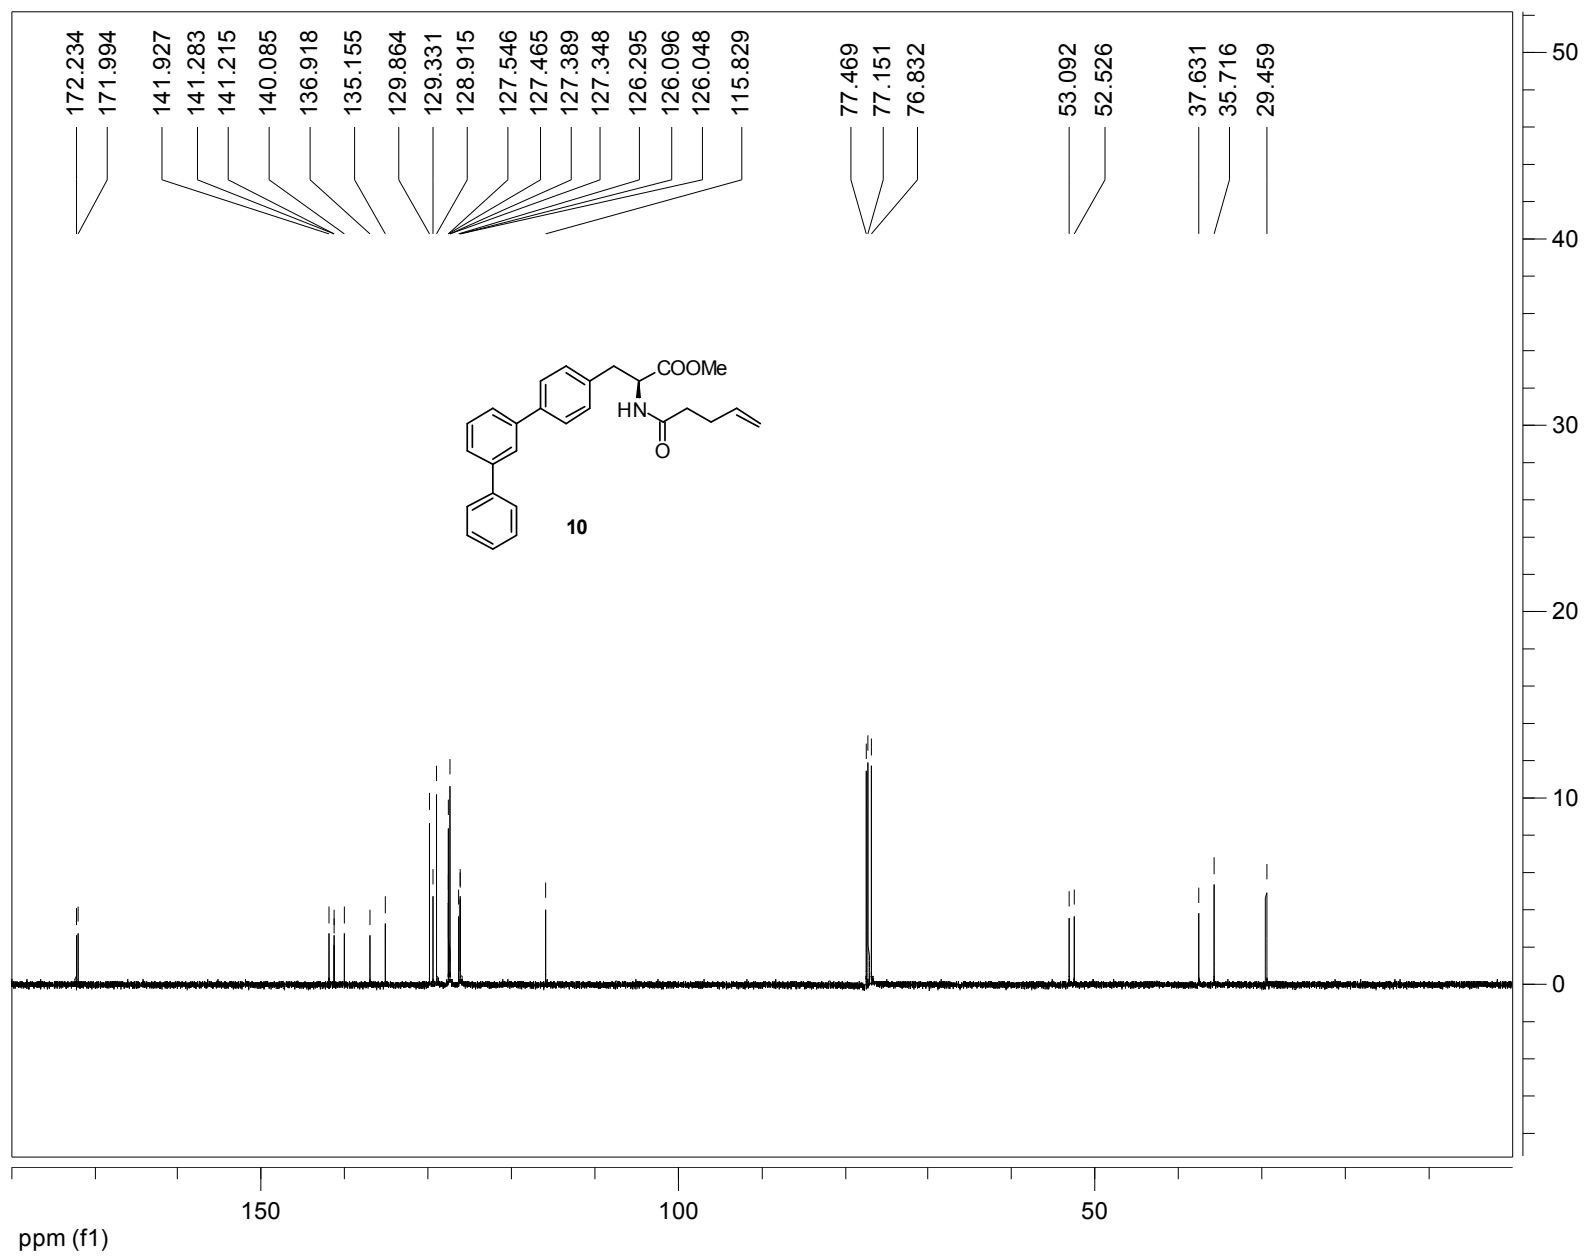

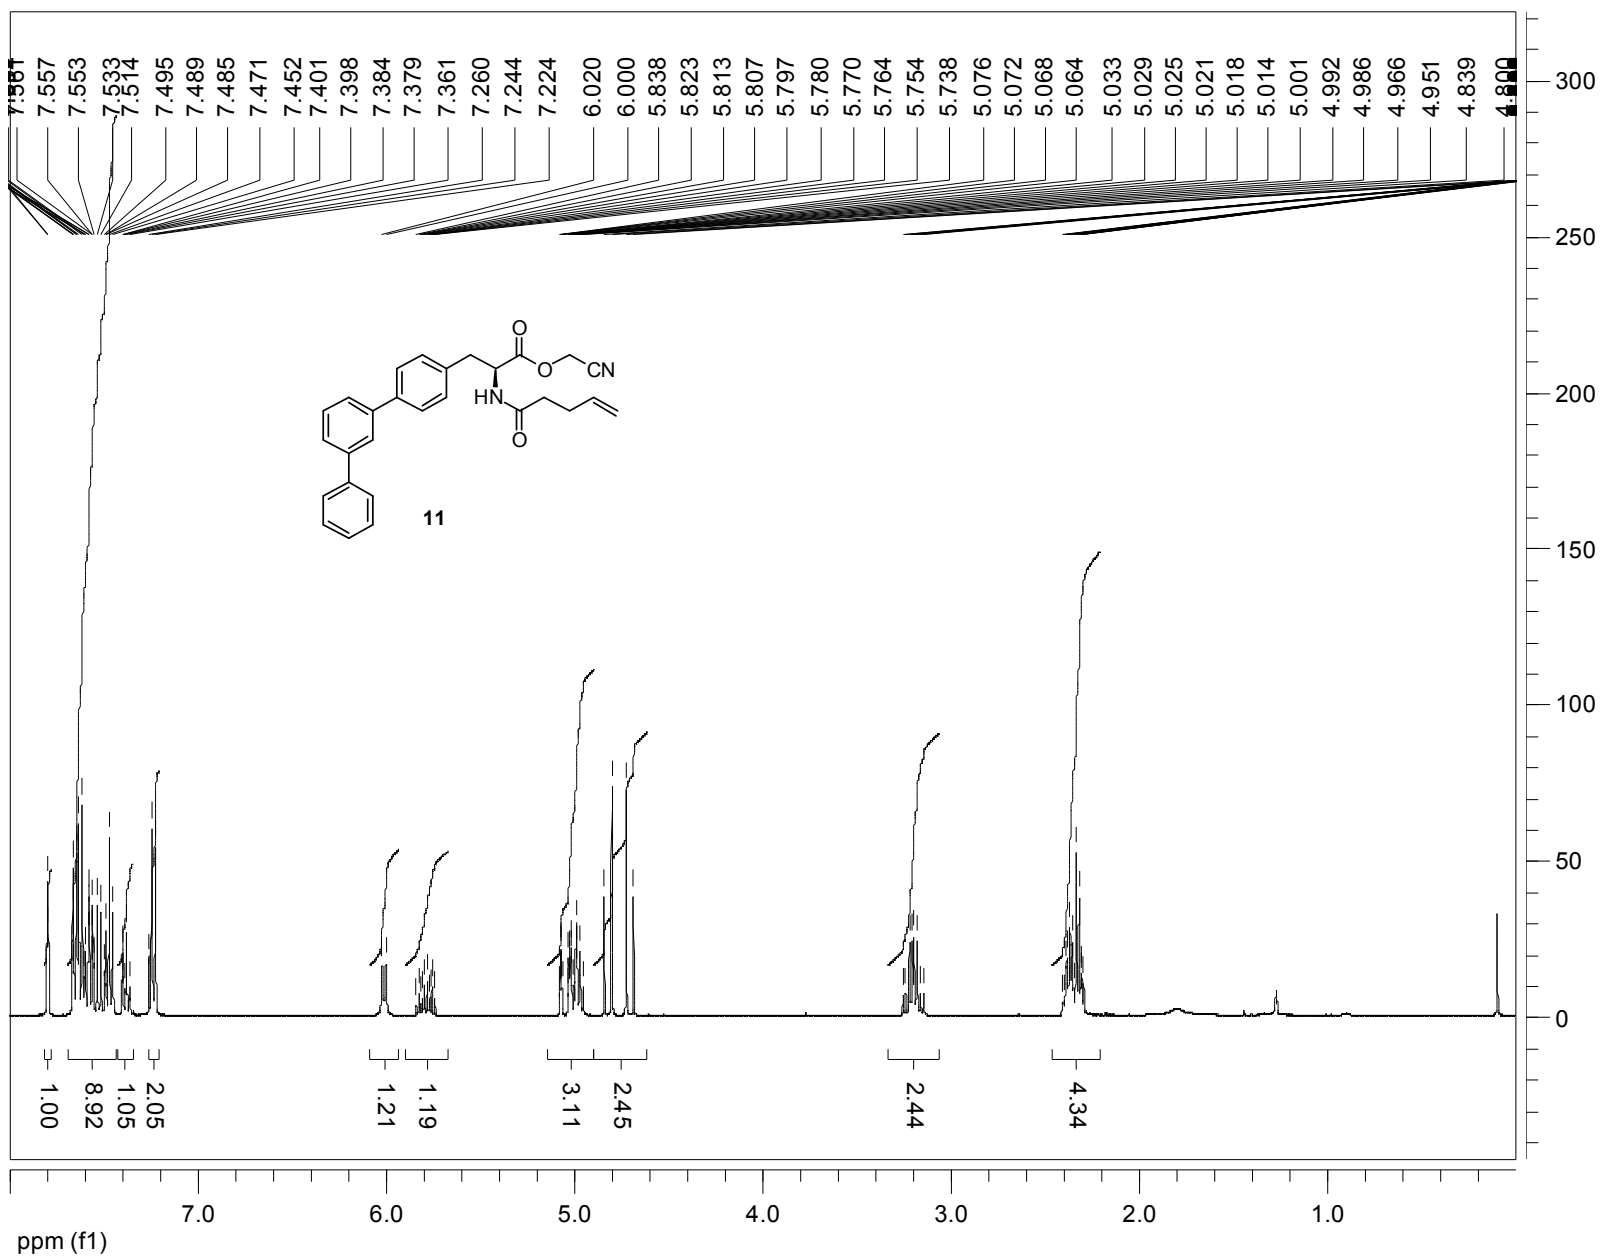

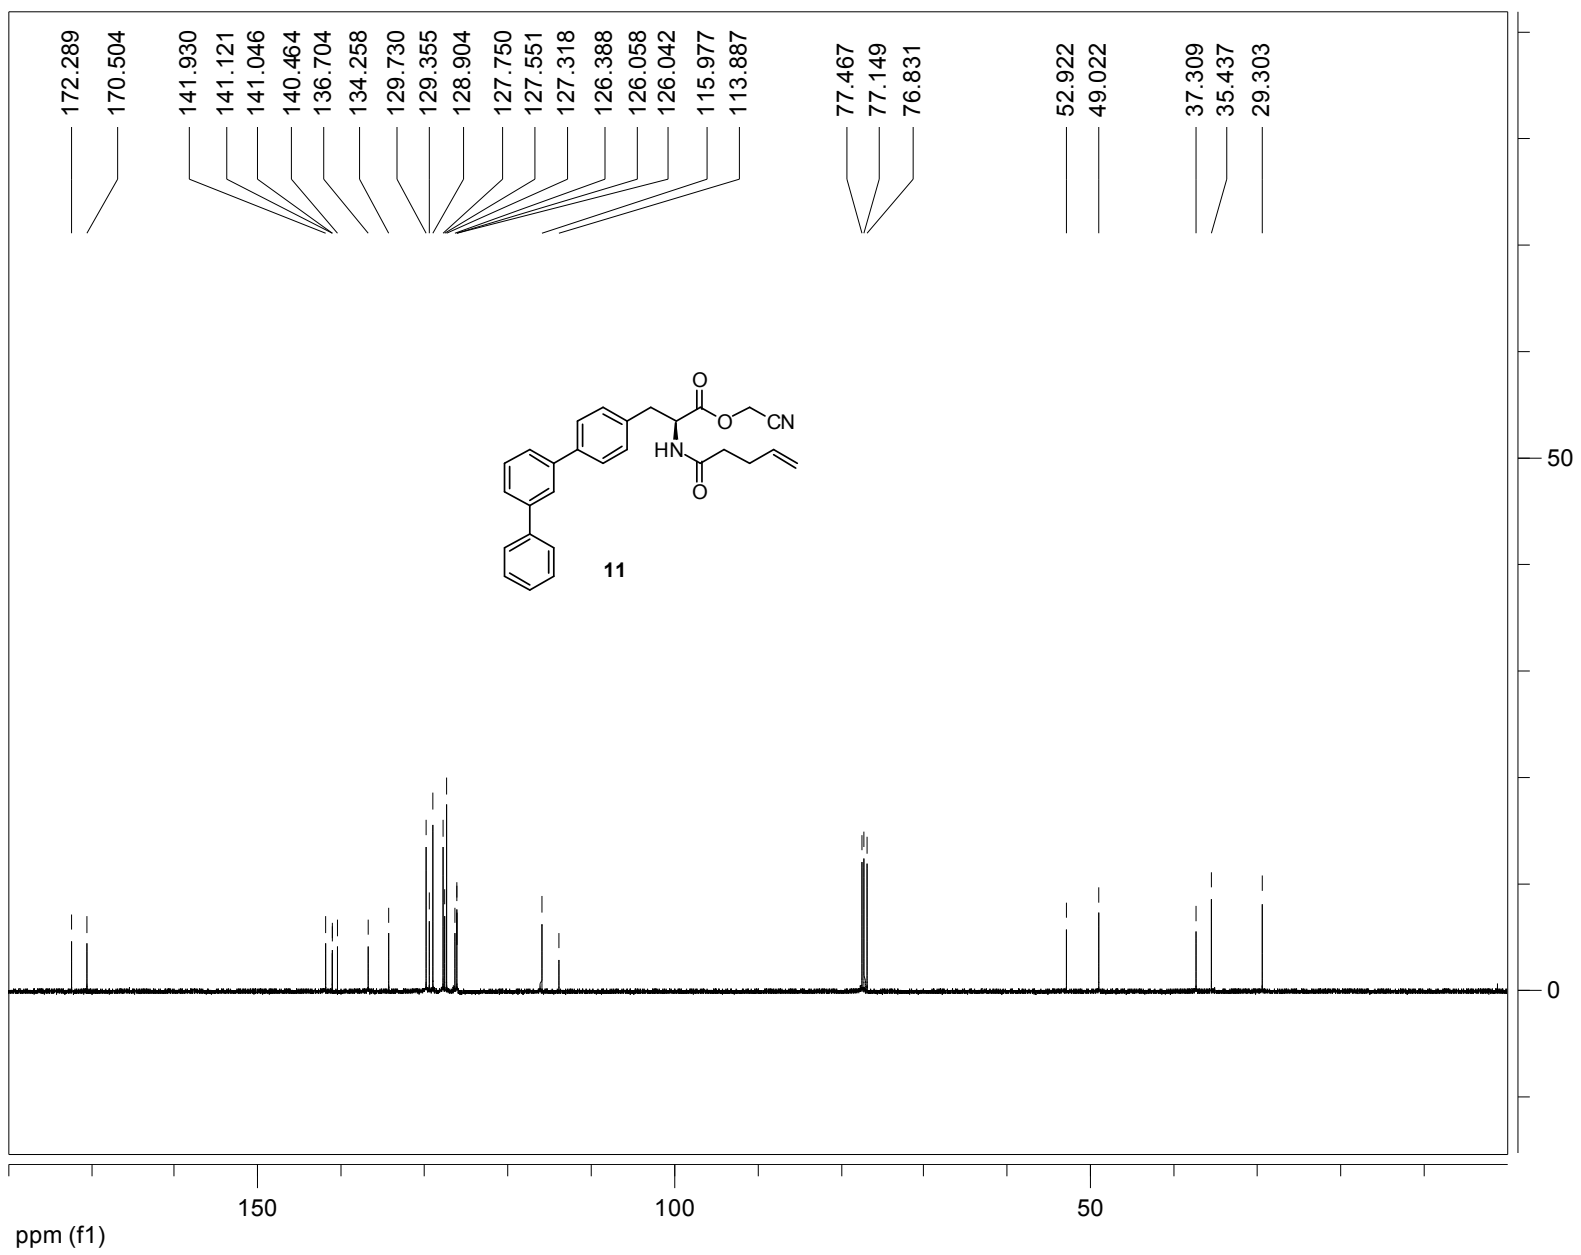

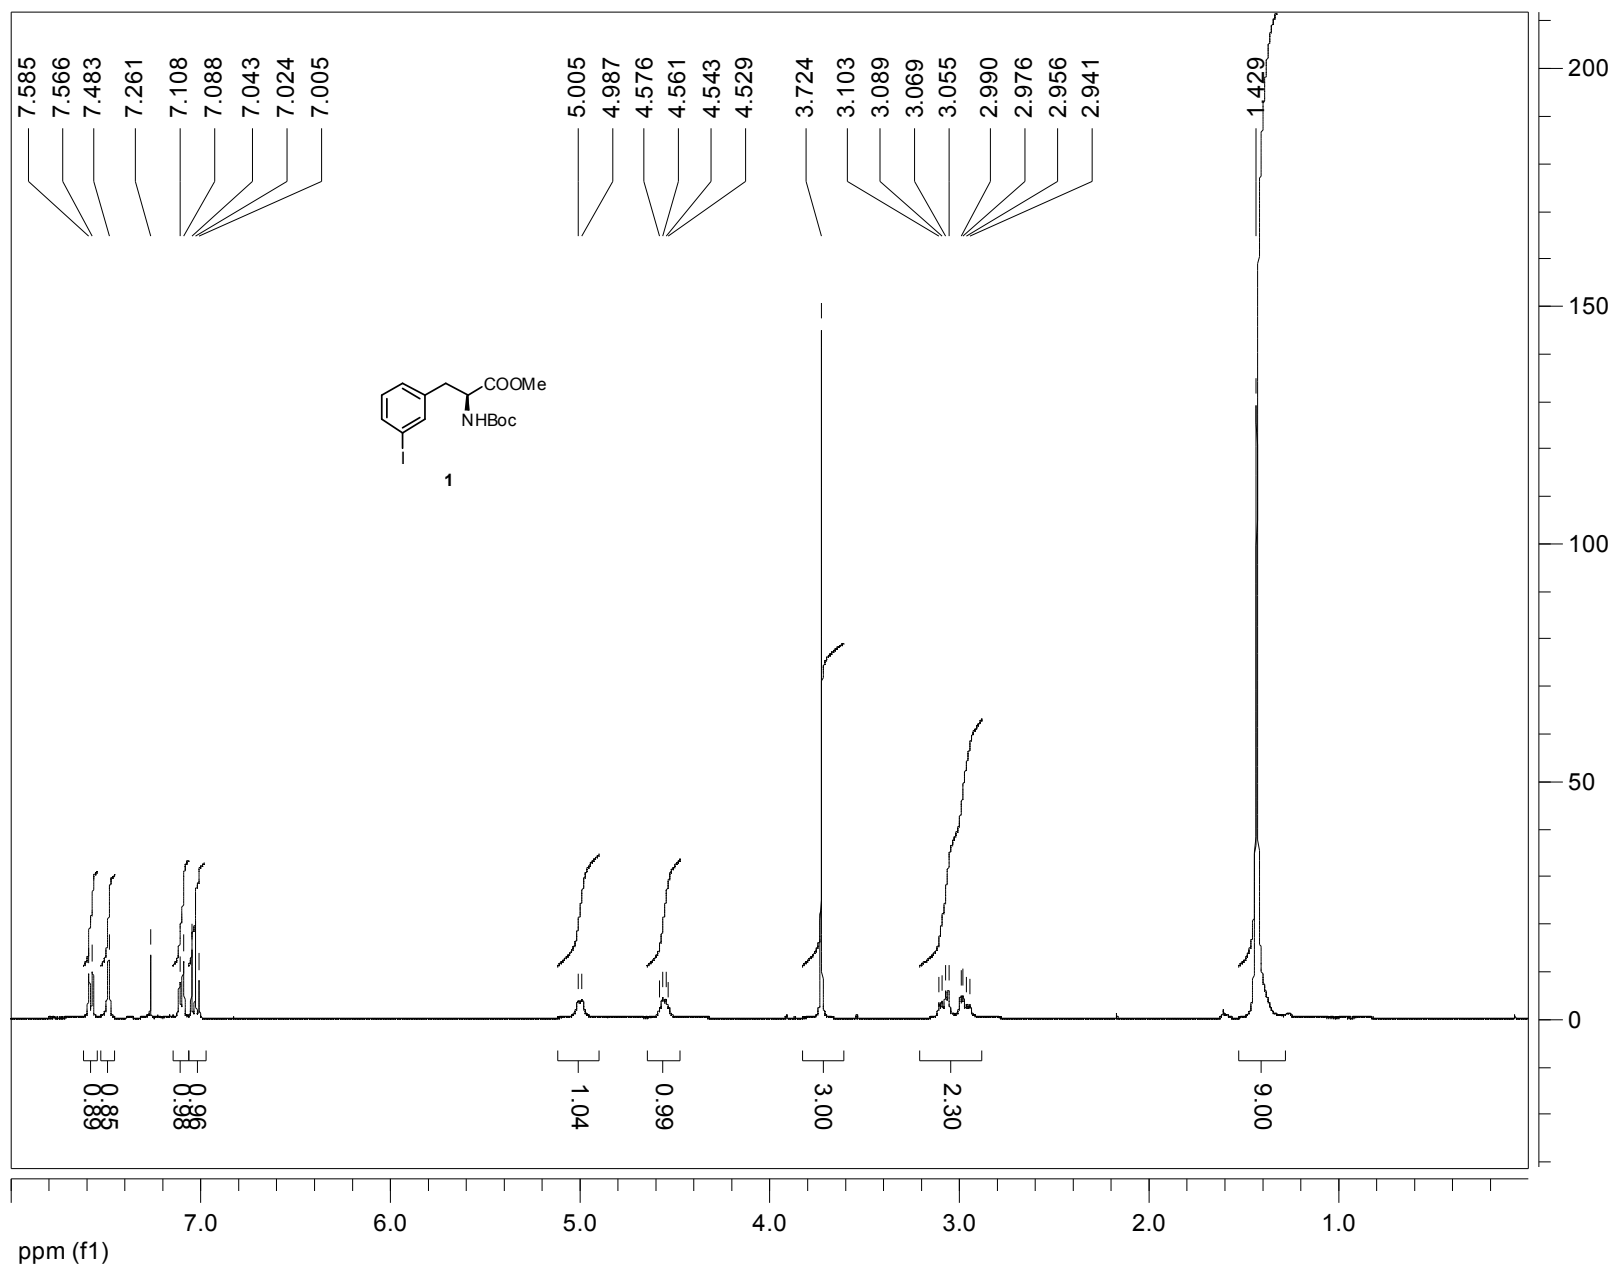

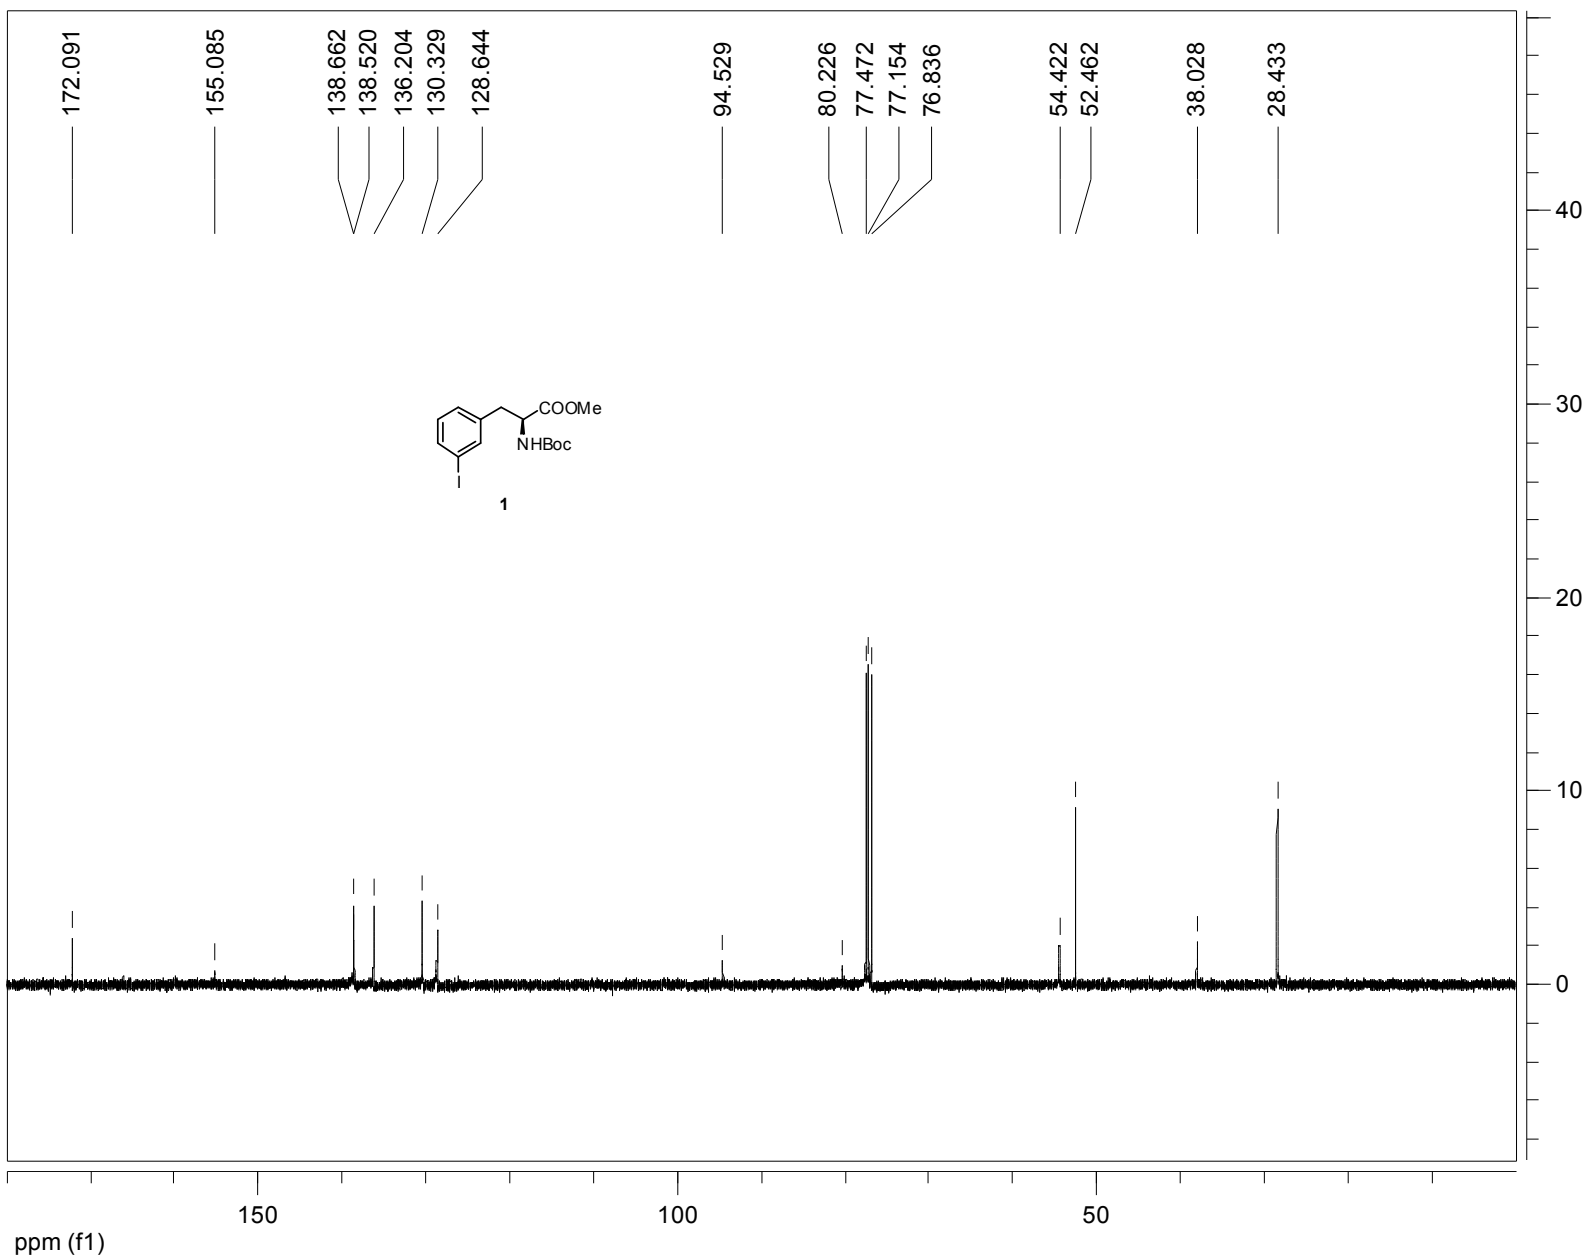

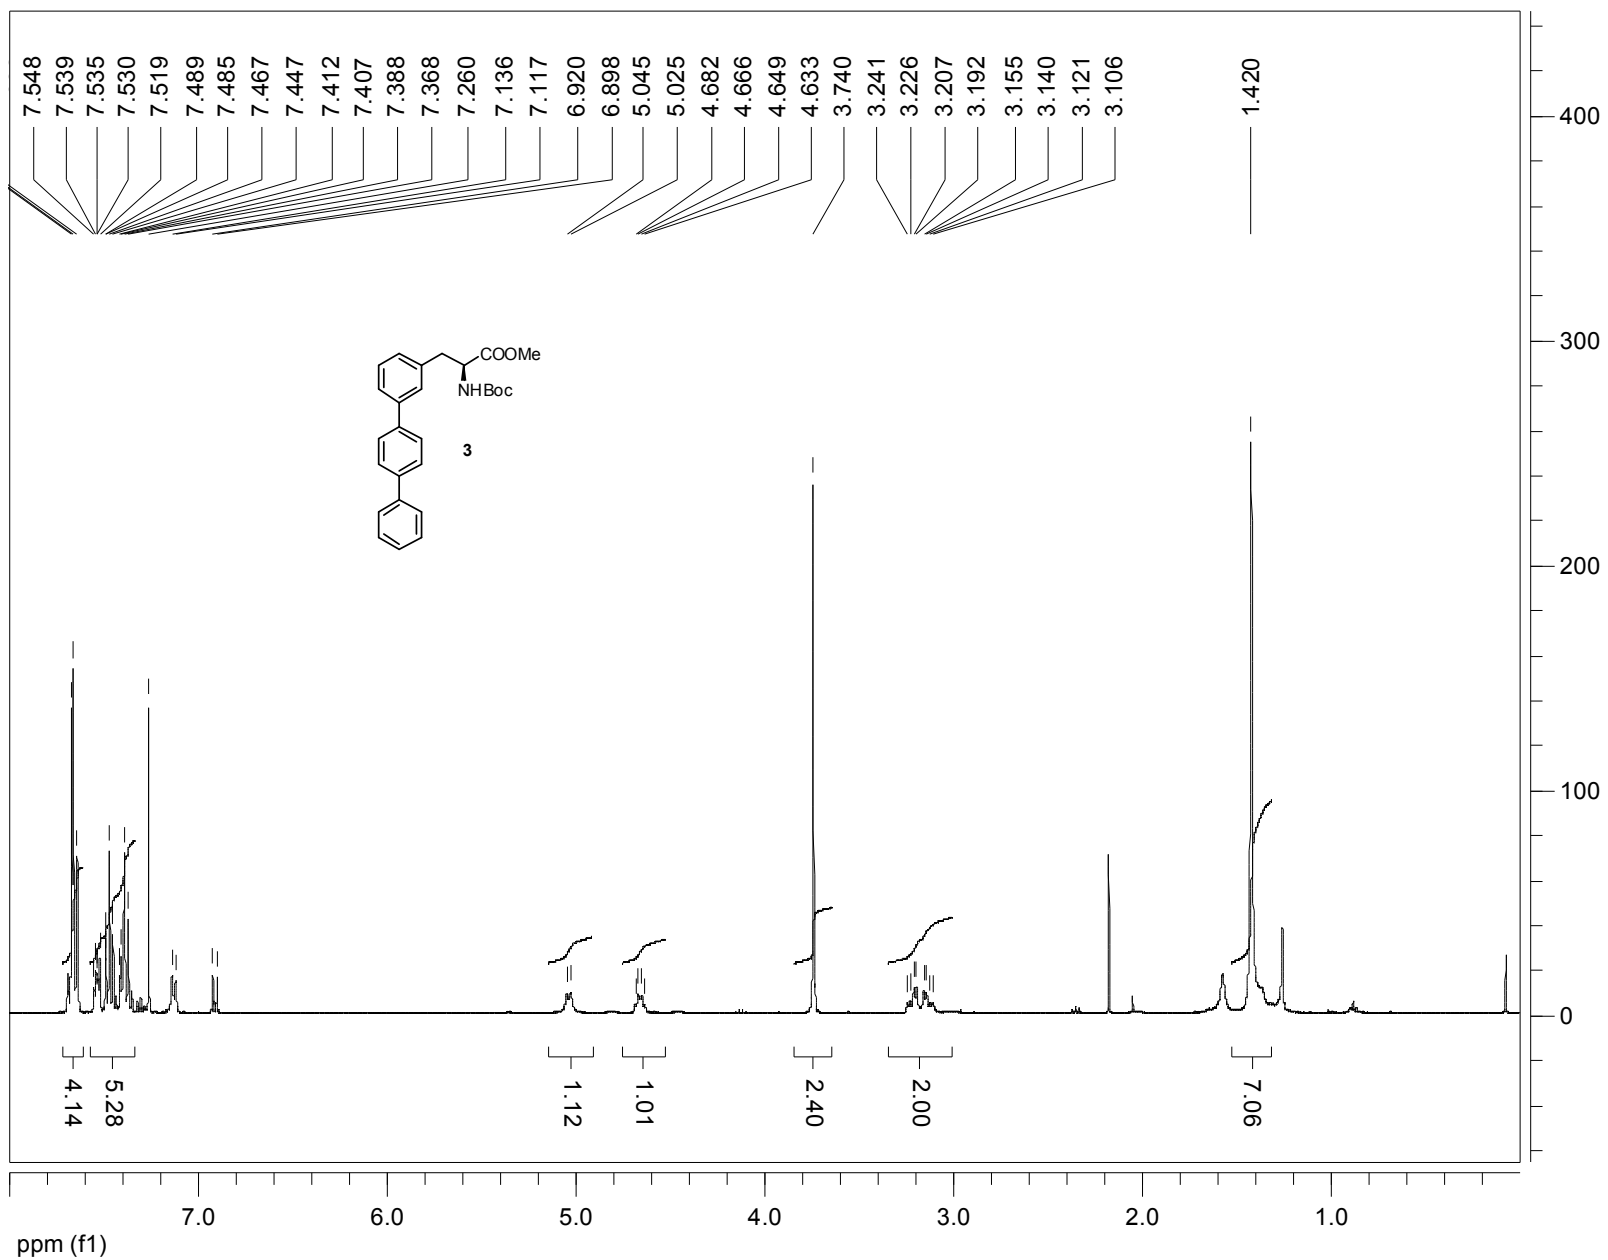

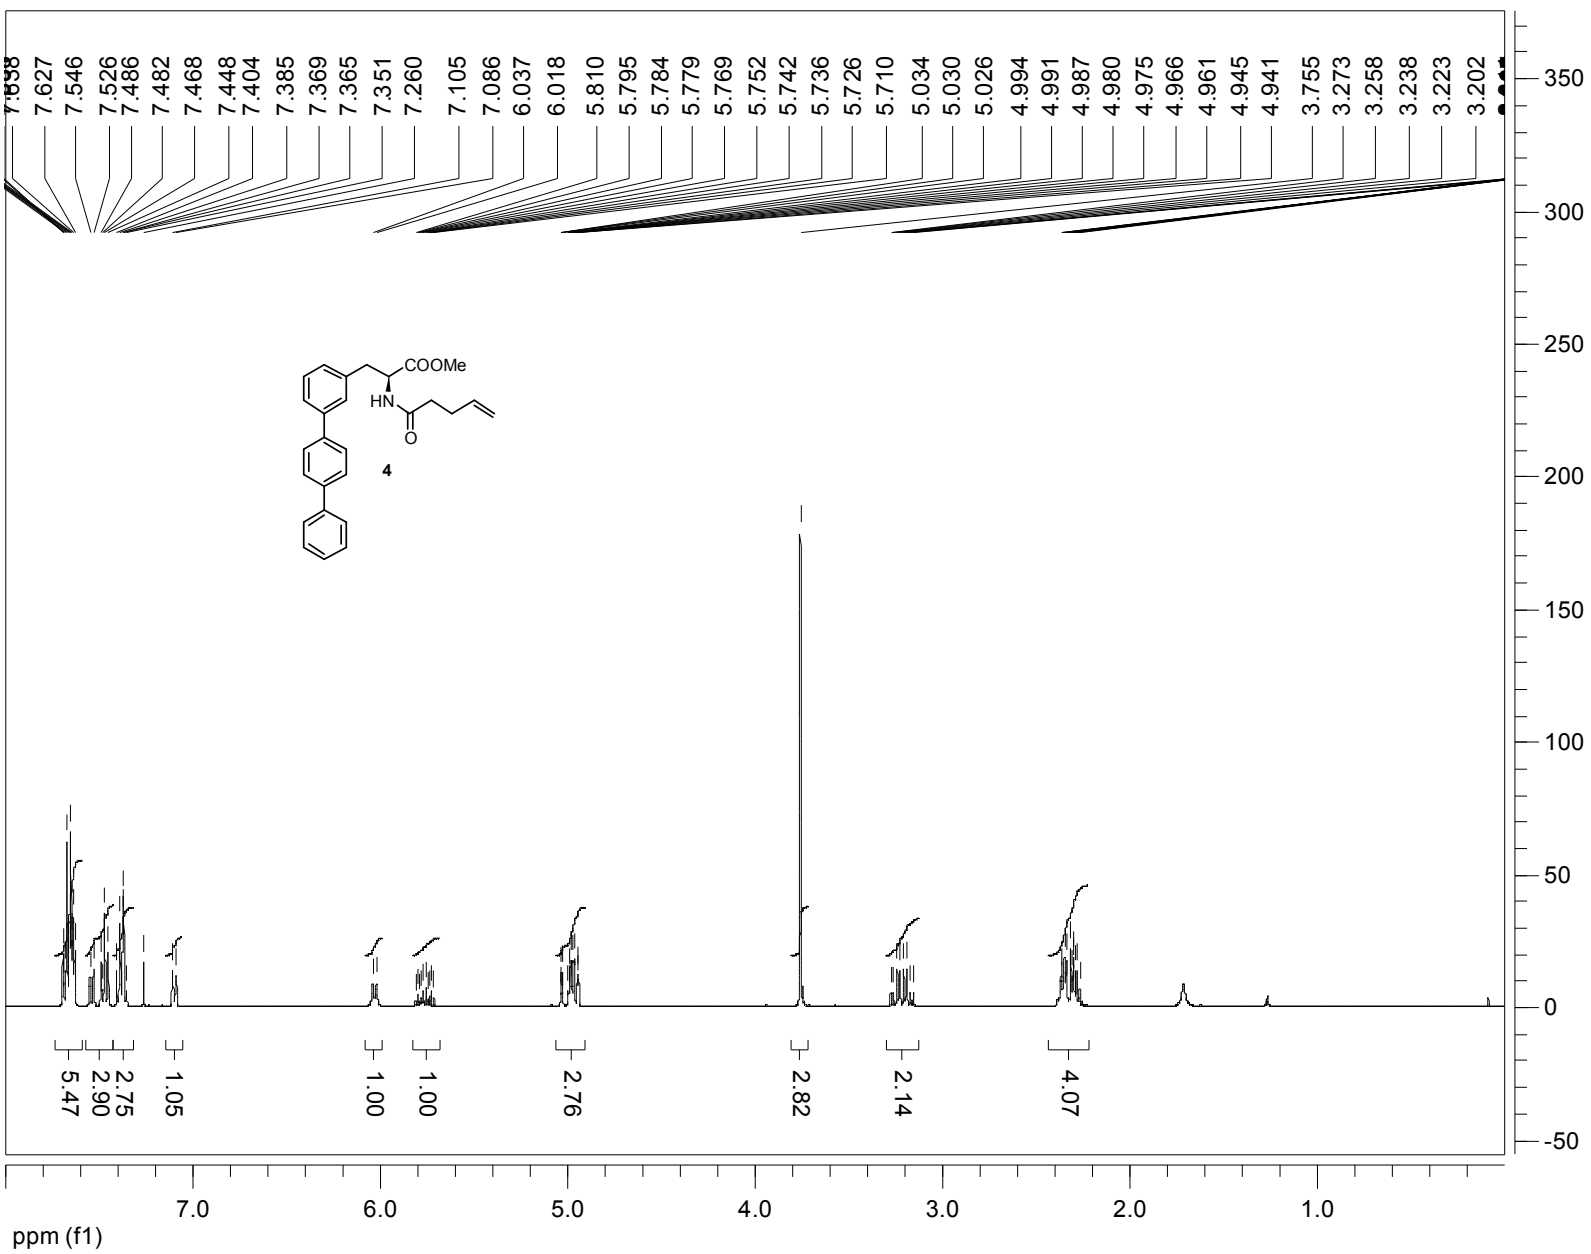



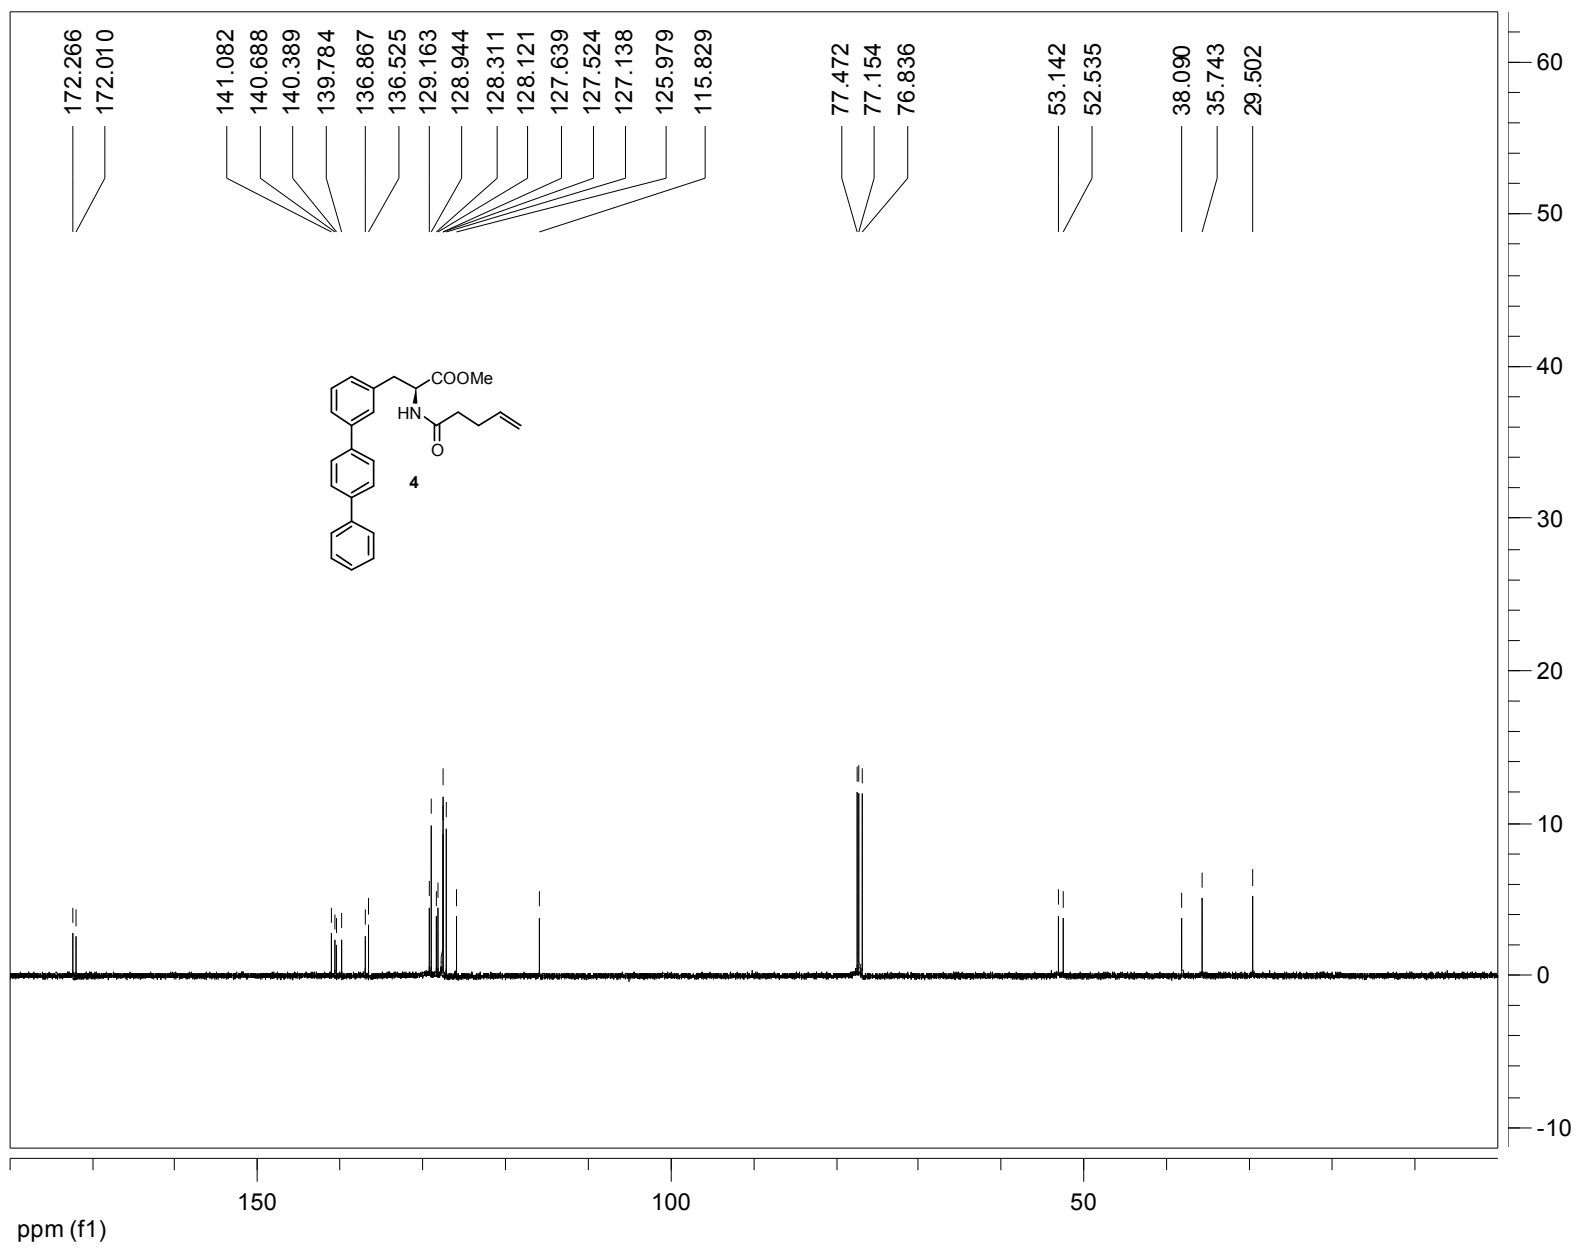

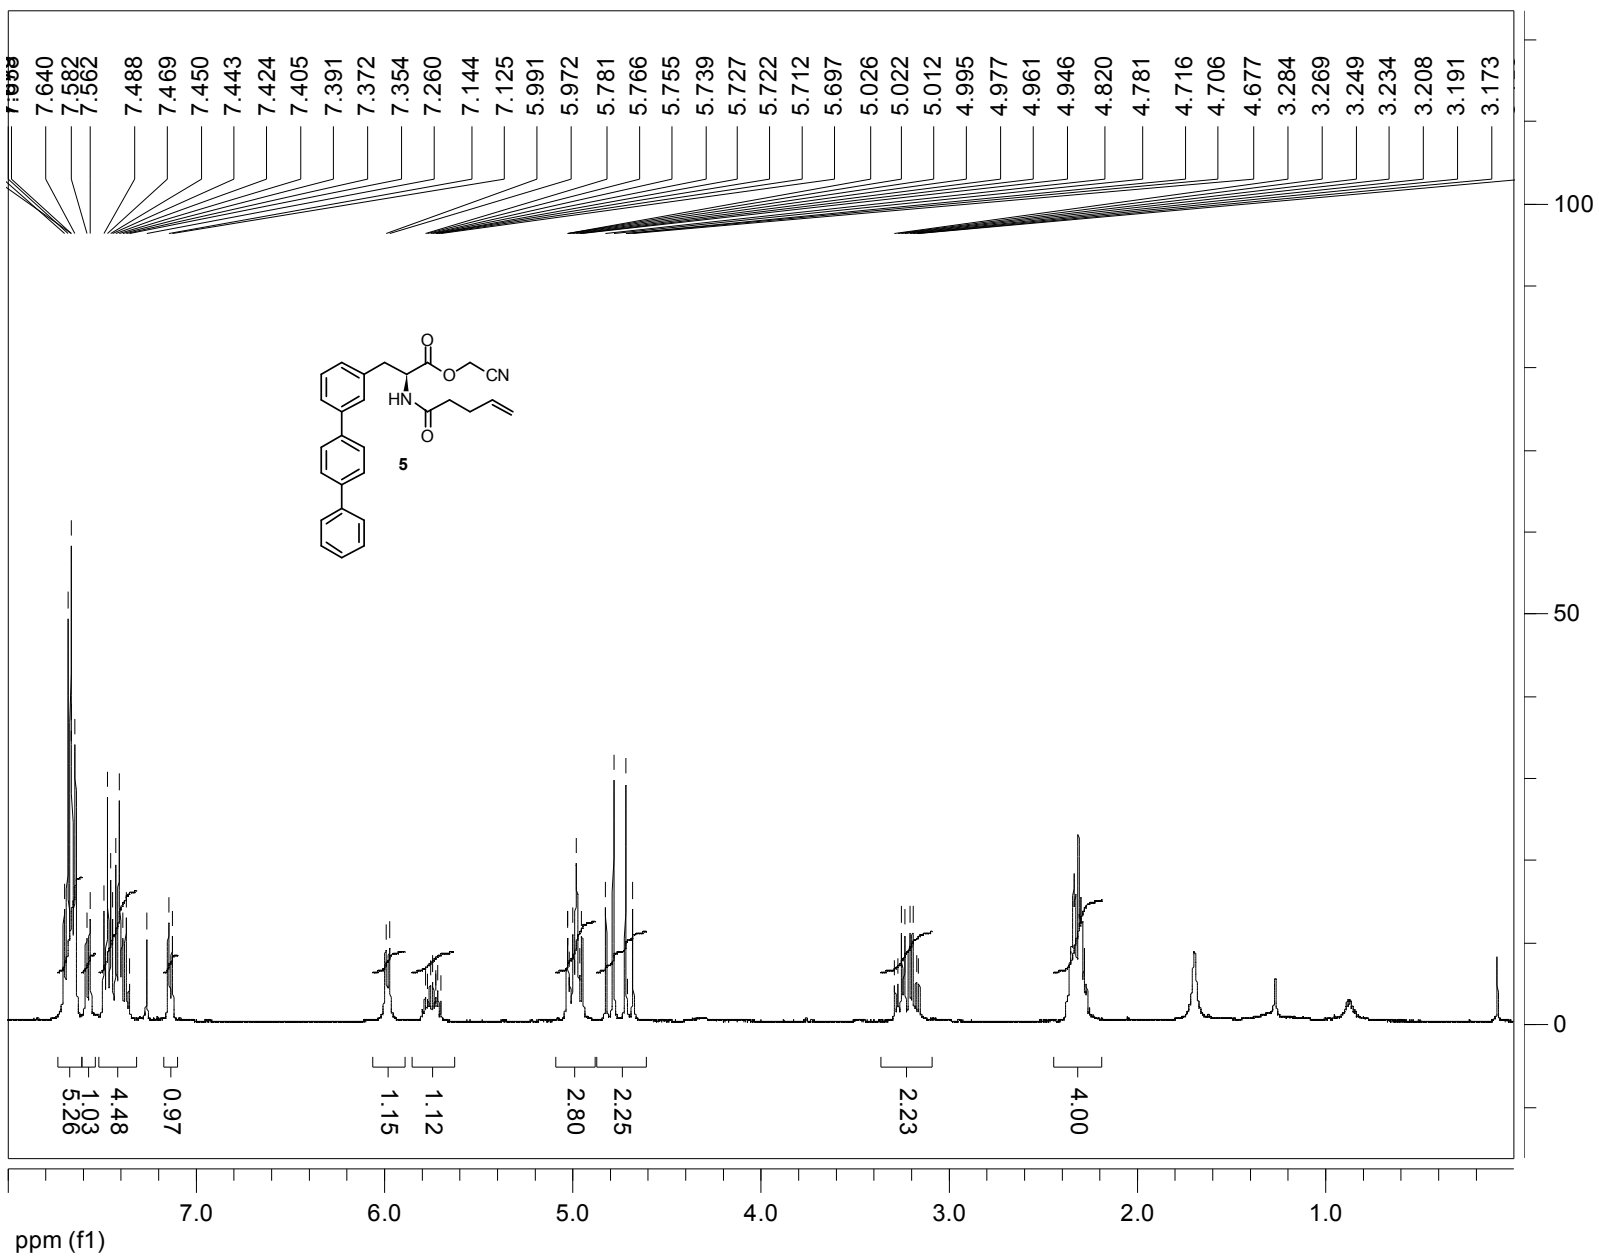

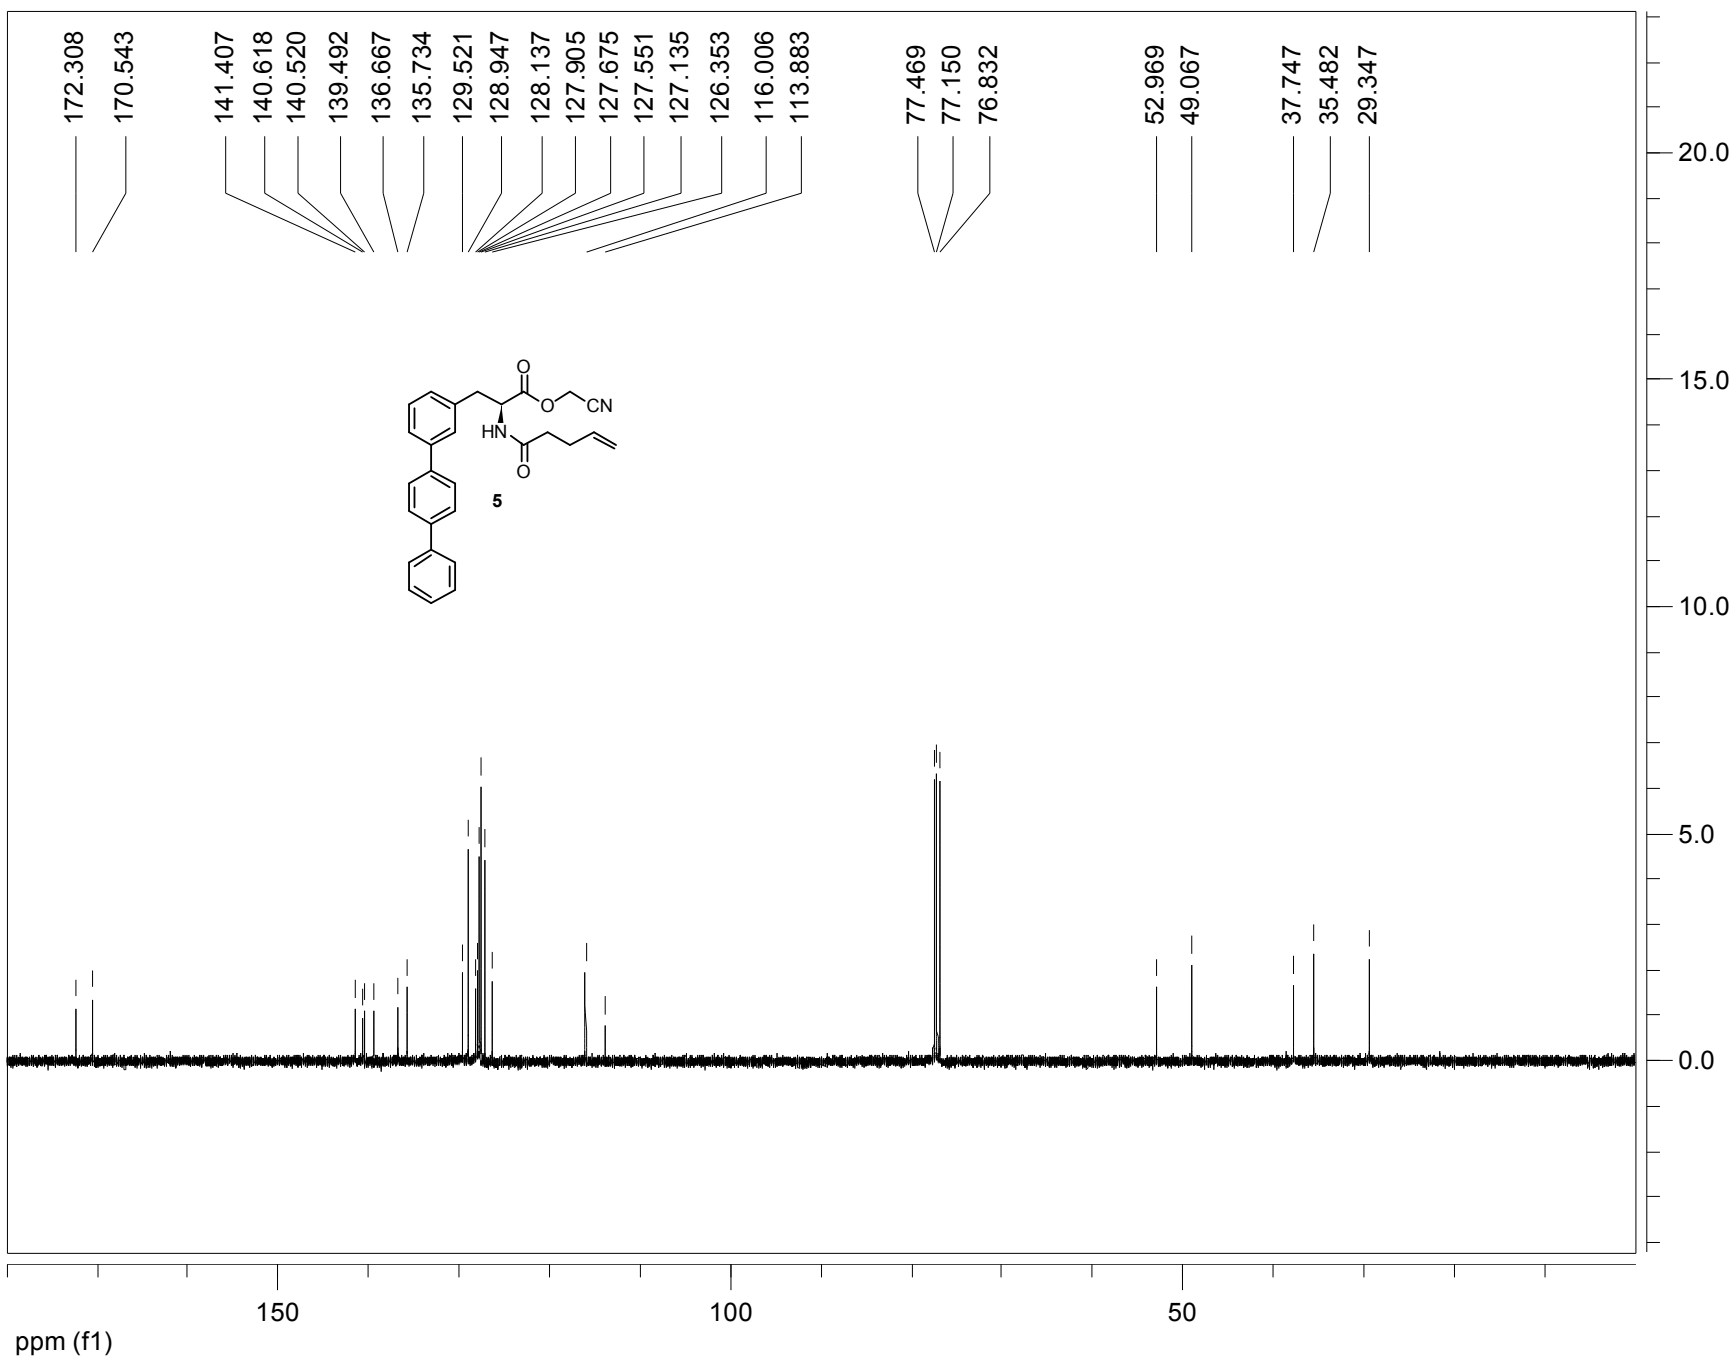

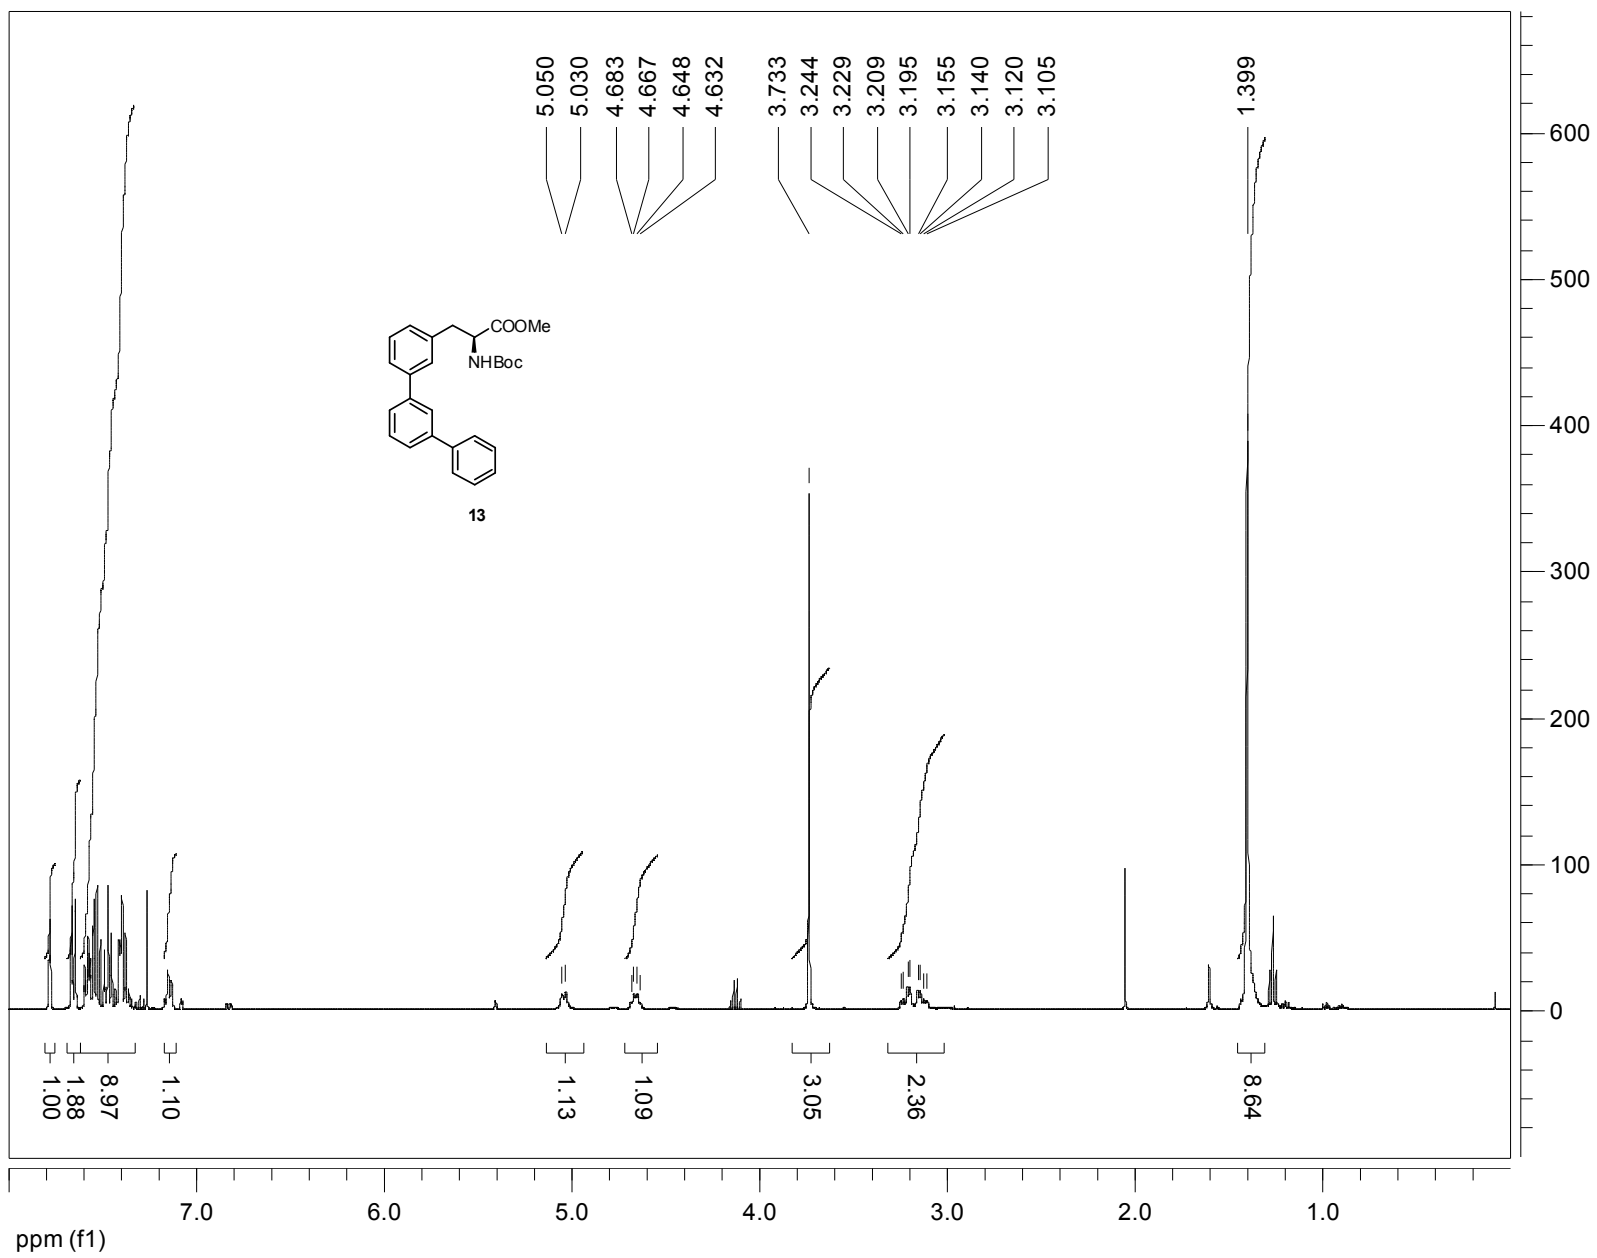

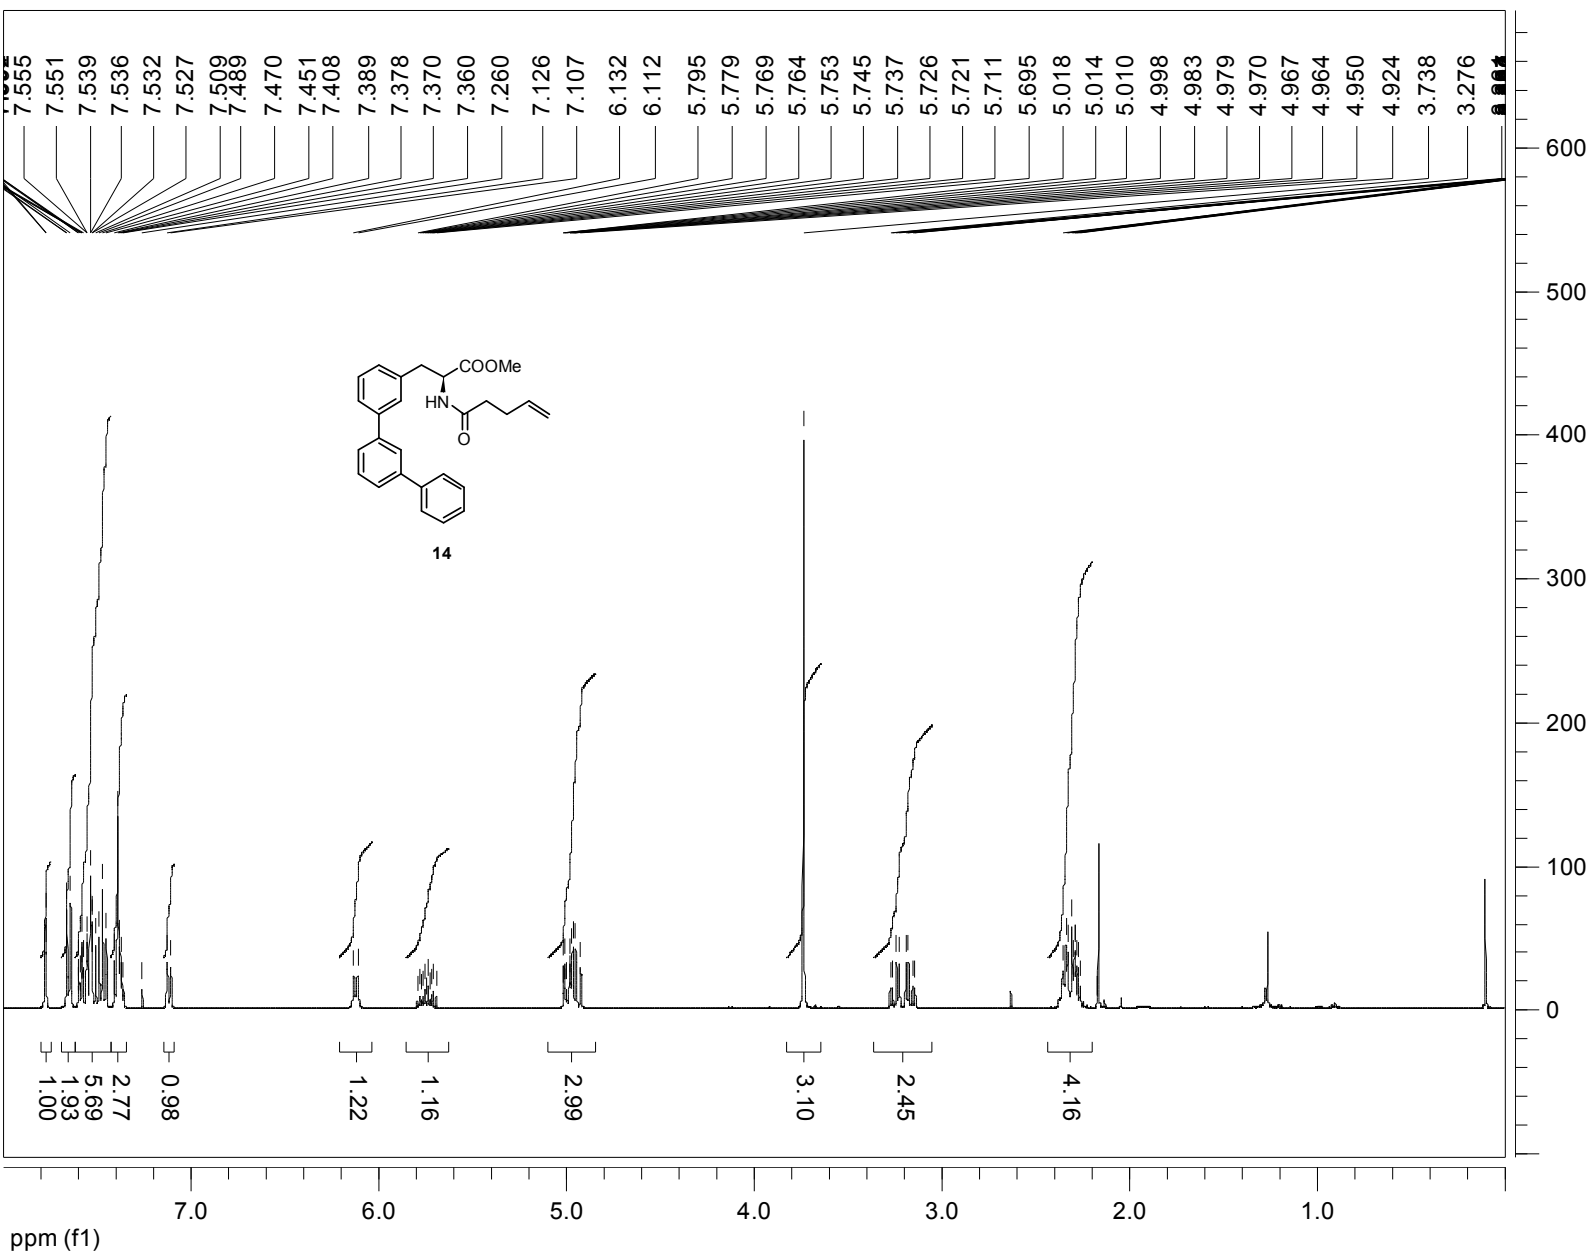

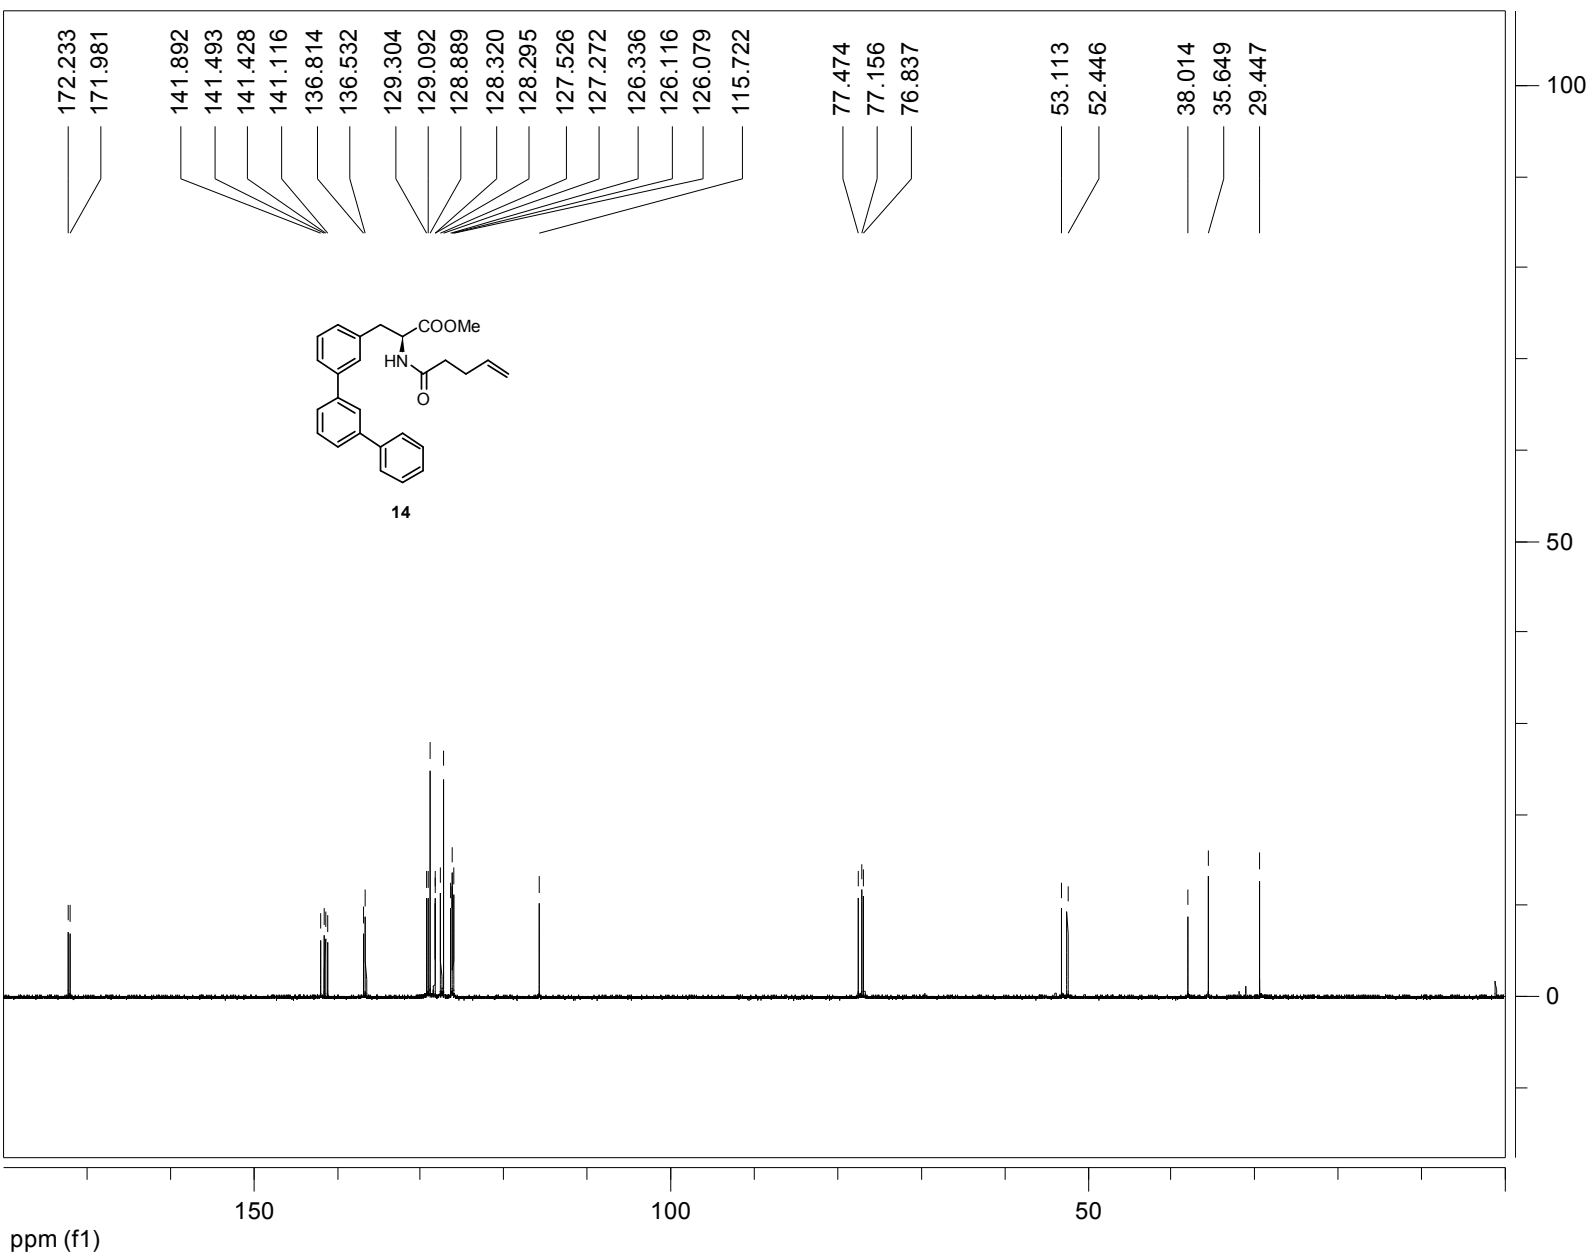

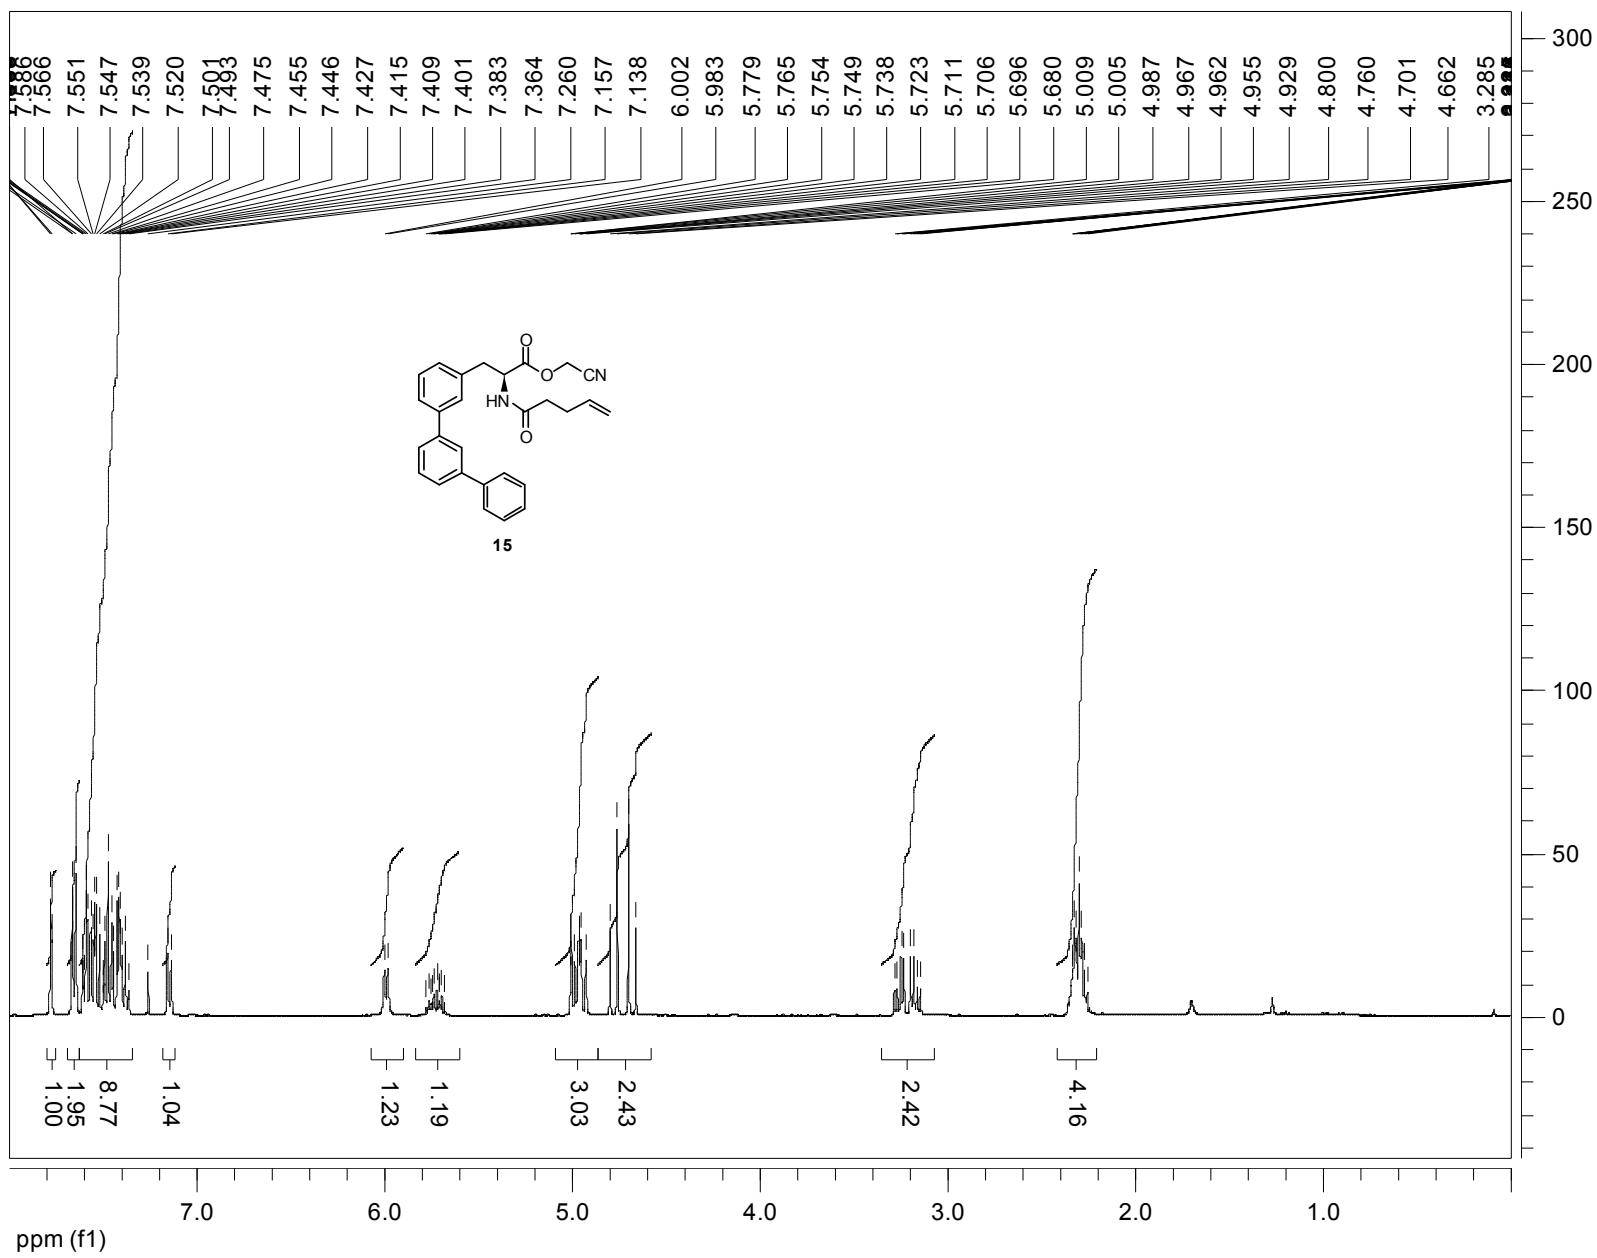

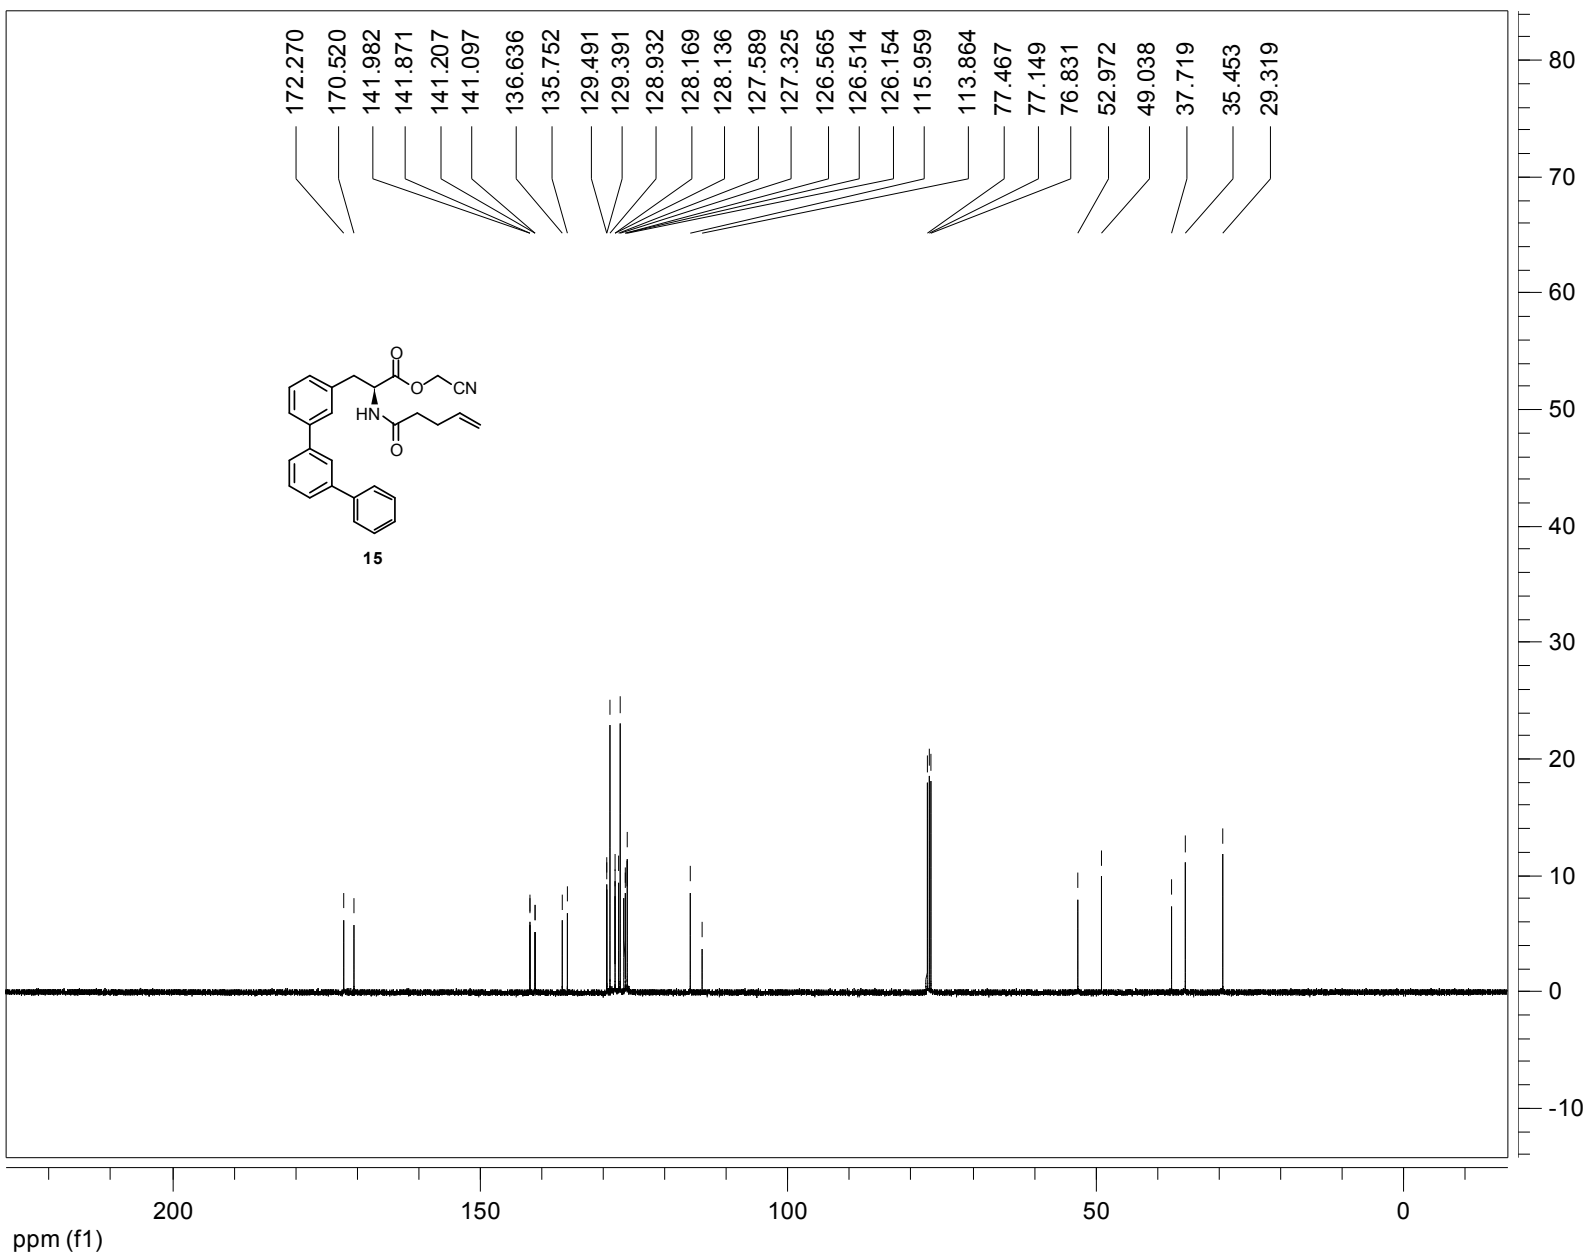

Supplement: NIHMS539693-supplement-2_si_002.pdf [file NIHMS539693-supplement-2_si_002.pdf]
